# Supplementary material for: Coralsnake Venomics: Analyses of Venom Gland Transcriptomes and Proteomes of Six Brazilian Taxa
Source: MDPI journal article supplement (doi:10.3390/toxins9060187), 2017-06-08
Supplement: s1 [file s1]

|                                 |                           | 231 | 240 | 250 | 260 | 270 | 280 | 290 | 300 | 310 | 320 | 330 | 340 |   |   |   |   |   |   |   |   |   |   |   |   |   |   |   |   |   |   |   |   |   |   |   |   |   |   |   |   |   |   |   |   |   |   |   |   |   |   |   |   |   |   |   |   |   |   |   |   |   |   |   |   |   |   |   |   |   |   |   |   |   |   |   |   |   |   |   |   |   |   |   |   |   |   |   |   |   |   |   |   |   |   |   |   |   |   |   |   |   |   |   |   |   |   |   |   |   |   |   |   |   |   |   |   |
|---------------------------------|---------------------------|-----|-----|-----|-----|-----|-----|-----|-----|-----|-----|-----|-----|---|---|---|---|---|---|---|---|---|---|---|---|---|---|---|---|---|---|---|---|---|---|---|---|---|---|---|---|---|---|---|---|---|---|---|---|---|---|---|---|---|---|---|---|---|---|---|---|---|---|---|---|---|---|---|---|---|---|---|---|---|---|---|---|---|---|---|---|---|---|---|---|---|---|---|---|---|---|---|---|---|---|---|---|---|---|---|---|---|---|---|---|---|---|---|---|---|---|---|---|---|---|---|---|
| <i>M. corallinus</i>            | DN98636_c0_g4_i1 m.23440  | L   | D   | L   | I   | G   | A   | R   | N   | P   | V   | F   | P   | V | Y | F | L | N | T | A | R | W | F | G | R | F | E | A | I | E | R | N | L | H | D | L | H | L | L | N | N | Y | S | S | E | R | Q | Y | F | R | S | N | L | R | R | H | P | V | E | D | D | H | I | P | F | L | R | R | G | V | P | I | L | H | L | I | P | S | P | F | P | R | V | W | H | T | M | E | D | N | E | E | N | L | D | K | P | T | I | D | N | L | S | K | I | L | Q | V | F | V | L | E | Y | L | N | L | G |
| <i>M. paraensis</i>             | DN82804_c0_g1_i1 m.14065  | L   | D   | L   | I   | G   | A   | R   | N   | P   | V   | F   | P   | V | Y | F | L | N | T | A | R | W | F | G | R | F | E | A | I | E | R | N | L | H | D | L | H | L | L | N | N | Y | S | S | E | R | Q | Y | F | R | S | N | L | R | R | H | P | V | E | D | D | H | I | P | F | L | R | R | G | V | P | I | L | H | L | I | P | S | P | F | P | R | V | W | H | T | M | E | D | N | E | E | N | L | D | K | P | T | I | D | N | L | S | K | I | L | Q | V | F | V | L | E | Y | L | N | L | G |
| <i>M. fulvius</i>               | GC F979133.1              | L   | D   | L   | I   | G   | A   | R   | N   | P   | V   | F   | P   | V | Y | F | L | N | T | A | R | W | F | G | R | F | E | A | I | E | R | S | L | H | D | L | H | L | L | N | N | Y | S | S | E | R | Q | Y | F | R | S | N | L | R | R | H | P | G | E | D | D | H | I | P | F | L | R | R | G | V | P | I | L | H | L | I | P | S | P | F | P | R | V | W | H | T | M | E | D | N | E | E | N | L | D | K | P | T | I | D | N | L | S | K | I | L | Q | V | F | V | L | E | Y | L | N | L | G |
| <i>M. l. carvalhoi</i>          | DN54560_c0_g1_i1 m.4890   | L   | D   | L   | I   | G   | A   | R   | N   | P   | V   | F   | P   | V | Y | F | L | N | T | A | R | W | F | G | R | F | E | A | I | E | R | N | L | H | D | L | H | L | L | N | N | Y | S | S | E | R | Q | Y | F | R | S | N | L | R | R | H | P | V | E | D | D | H | I | P | F | L | R | R | G | V | P | I | L | H | L | I | P | S | P | F | P | R | V | W | H | T | M | E | D | N | E | E | N | L | D | K | P | T | I | D | N | L | S | K | I | L | Q | V | F | V | L | E | Y | L | N | L | G |
| <i>M. l. lemniscatus</i>        | DN86354_c0_g1_i1 m.64768  | L   | D   | L   | I   | G   | A   | R   | N   | P   | V   | F   | P   | V | Y | F | L | N | T | A | R | W | F | G | R | F | E | A | I | E | R | N | L | H | D | L | H | L | L | N | N | Y | S | S | E | R | Q | Y | F | R | S | N | L | R | R | H | P | V | E | D | D | H | I | P | F | L | R | R | G | V | P | I | L | H | L | I | P | S | P | F | P | R | V | W | H | T | M | E | D | N | E | E | N | L | D | K | P | T | I | D | N | L | S | K | I | L | Q | V | F | V | L | E | Y | L | N | L | G |
| <i>M. surinamensis</i>          | DN83858_c0_g1_i1 m.39053  | L   | D   | L   | I   | G   | A   | R   | N   | P   | V   | F   | P   | V | Y | F | L | N | T | A | R | W | F | G | R | F | E | A | I | E | R | N | L | H | D | L | H | L | L | N | N | Y | S | S | E | R | Q | Y | F | R | S | N | L | R | R | H | P | V | E | D | D | H | I | P | F | L | R | R | G | V | P | I | L | H | L | I | P | S | P | F | P | R | V | W | H | T | M | E | D | N | E | E | N | L | D | K | P | T | I | D | N | L | S | K | I | L | Q | V | F | V | L | E | Y | L | N | L | G |
| <i>M. spixii</i>                | DN101070_c0_g1_i1 m.17594 | L   | D   | L   | I   | G   | A   | R   | N   | P   | V   | F   | P   | V | Y | F | L | N | T | A | R | W | F | G | R | F | E | A | I | E | R | N | L | H | D | L | N | L | L | N | N | Y | S | S | E | R | Q | Y | F | R | S | N | L | R | R | H | P | V | E | D | D | H | I | P | F | L | R | R | G | V | P | I | L | H | L | I | P | S | P | F | P | R | V | W | H | T | M | E | D | N | E | E | N | L | D | K | P | T | I | D | N | L | S | K | I | L | Q | V | F | V | L | E | Y | L | N | L | G |
| <i>Protothrops flavoviridis</i> | GC BAN89375.1             | L   | D   | L   | I   | G   | A   | R   | N   | P   | V   | F   | P   | V | Y | F | L | N | T | A | R | W | F | G | R | L | E | T | I | E | R | N | L | Y | D | L | G | L | L | N | N | Y | S | S | E | R | Q | Y | F | R | S | N | L | R | R | Y | P | V | E | D | D | H | I | P | F | L | R | R | G | V | P | I | L | H | L | I | P | S | P | F | P | R | V | W | H | T | M | E | D | N | E | E | N | L | D | K | P | T | I | D | N | L | S | K | I | L | Q | V | F | V | L | E | Y | L | N | L | G |
