# Supplementary material for: Coralsnake Venomics: Analyses of Venom Gland Transcriptomes and Proteomes of Six Brazilian Taxa
Source: MDPI journal article supplement (doi:10.3390/toxins9060187), 2017-06-08
Supplement: s1 [file s1]

| Species                   | Transcript ID             | 1 | 10 | 20 | 30 | 40 | 50 | 60 | 70 | 80 | 90 | 100 | 110 | 120 | 130 | 140 | 150 | 160 | 170 | 180 | 190 |   |   |   |   |   |   |   |   |   |   |   |   |   |   |   |   |   |   |   |   |   |   |   |   |   |   |   |   |   |   |   |   |   |   |   |   |   |   |   |   |   |   |   |   |   |   |   |   |   |   |   |   |   |   |     |   |   |   |   |   |   |   |   |   |   |   |   |   |   |   |   |   |   |   |   |   |   |   |   |   |   |   |   |   |   |   |   |   |   |   |   |   |   |   |   |   |   |   |   |   |   |   |   |   |   |   |   |   |   |   |   |   |   |   |   |   |   |   |   |   |   |   |   |   |   |   |   |   |   |   |   |   |   |   |   |   |   |   |   |   |   |   |   |   |   |   |   |   |   |   |   |   |   |   |   |   |   |   |   |   |   |   |   |   |   |   |   |   |   |   |   |   |   |   |   |
|---------------------------|---------------------------|---|----|----|----|----|----|----|----|----|----|-----|-----|-----|-----|-----|-----|-----|-----|-----|-----|---|---|---|---|---|---|---|---|---|---|---|---|---|---|---|---|---|---|---|---|---|---|---|---|---|---|---|---|---|---|---|---|---|---|---|---|---|---|---|---|---|---|---|---|---|---|---|---|---|---|---|---|---|---|-----|---|---|---|---|---|---|---|---|---|---|---|---|---|---|---|---|---|---|---|---|---|---|---|---|---|---|---|---|---|---|---|---|---|---|---|---|---|---|---|---|---|---|---|---|---|---|---|---|---|---|---|---|---|---|---|---|---|---|---|---|---|---|---|---|---|---|---|---|---|---|---|---|---|---|---|---|---|---|---|---|---|---|---|---|---|---|---|---|---|---|---|---|---|---|---|---|---|---|---|---|---|---|---|---|---|---|---|---|---|---|---|---|---|---|---|---|---|---|---|---|
| <i>Ophiophagus hannah</i> | Ohanin AAZ15707.1         | M | L  | L  | F  | T  | L  | C  | F  | F  | A  | D   | Q   | E   | N   | G   | G   | K   | A   | L   | A   | S | P | P | G | N | W | Q | K | A | D | V | T | F | D | S | N | T | A | F | E | S | L | V | V | S | P | D | K | K | T | V | E | N | V | G | V | P | K | G | V | P | D | S | P | E | R | F | S | S | S | P | C | V | L | G   | S | P | G | F | R | S | G | K | H | F | F | E | V | K | Y | G | T | Q | R | E | W | A | V | G | L | A | G | K | S | V | K | R | K | G | Y | L | R | L | V | P | E | E | R | I | W | Q | K | G | L | W | W | L | R | R | L | E | T | D | S | D | - | K | L | Q | K | G | S | G | K | I | I | V | F | L | D | Y | D | E | G | K | V | I | F | D | L | D | G | E | V | T | T | I | Q | A | N | F | N | G | E | E | V | V | P | F | Y | Y | I | G | A | R | V | S | L | A | N | L | - | - |   |   |
| <i>M. l. lemniscatus</i>  | DN86277_c0_g1_i1 m.65939  | M | L  | L  | F  | T  | L  | C  | F  | F  | A  | D   | R   | E   | N   | G   | G   | K   | A   | L   | A   | S | P | P | G | K | W | Q | K | A | D | V | T | F | D | S | N | T | A | F | K | S | L | V | V | S | P | D | K | K | T | V | K | N | V | G | V | P | Q | A | V | P | D | N | P | K | R | F | T | S | S | P | C | V | L | G   | S | P | G | F | Q | S | G | K | H | F | F | E | V | K | Y | G | S | Q | R | E | W | A | V | G | I | A | R | K | S | V | K | R | K | G | Y | L | K | L | V | P | K | E | W | I | W | Q | K | G | P | W | W | V | - | R | R | L | E | T | D | S | D | K | L | Q | K | G | S | G | K | I | V | V | F | L | D | Y | N | E | G | K | V | I | F | - | - | D | L | D | G | E | V | T | T | V | K | A | S | F | E | G | E | E | V | V | P | F | Y | Y | L | G | G | G | V | S | L | T | N | L | - | - |
| <i>M. surinamensis</i>    | DN78344_c40_g2_i1 m.9290  | M | L  | L  | F  | T  | L  | C  | F  | F  | A  | D   | R   | E   | N   | G   | G   | K   | A   | L   | A   | S | P | P | G | K | W | Q | K | A | D | V | T | F | D | S | N | T | A | F | K | S | L | V | V | S | P | D | K | K | T | V | K | N | V | G | V | P | Q | A | V | P | D | N | P | K | R | F | T | S | S | P | C | V | L | G   | S | P | G | F | Q | S | G | K | H | F | F | E | V | K | Y | G | S | Q | R | E | W | A | V | G | I | A | R | K | S | V | K | R | K | G | Y | L | K | L | V | P | K | E | W | I | W | Q | K | G | P | W | W | V | - | R | R | L | E | T | D | S | D | K | L | Q | K | G | S | G | K | I | V | V | F | L | D | Y | N | E | G | K | V | I | F | - | - | D | L | D | G | E | V | T | T | V | K | A | S | F | E | G | E | E | V | V | P | F | Y | Y | L | G | G | G | V | S | L | T | N | L | - | - |
| <i>M. spixii</i>          | DN58802_c0_g1_i1 m.43568  | M | L  | L  | F  | T  | L  | C  | F  | F  | A  | D   | Q   | E   | N   | G   | G   | K   | A   | L   | A   | S | P | P | G | K | W | H | K | A | D | V | T | F | D | S | N | T | A | F | E | S | L | V | V | S | P | D | K | K | S | V | E | N | V | G | V | P | H | A | V | P | D | N | P | E | R | F | N | R | S | P | C | V | L | G   | S | P | G | F | Q | S | G | K | H | F | F | E | V | K | Y | G | T | Q | R | E | W | A | V | G | L | A | R | K | S | V | K | R | K | G | Y | L | K | L | V | P | K | E | W | I | W | Q | K | G | P | W | W | V | - | R | R | L | K | T | D | S | D | K | L | Q | K | G | S | G | K | I | V | V | F | L | D | Y | N | E | G | K | V | I | F | - | - | D | L | D | G | E | V | T | T | V | Q | A | S | F | N | G | E | E | V | V | P | F | Y | Y | L | G | G | G | V | S | L | T | N | L | - | - |
| <i>M. l. carvalhoi</i>    | DN78252_c5_g1_i1 m.32581  | M | L  | L  | F  | T  | L  | C  | F  | F  | A  | D   | R   | E   | N   | G   | G   | K   | A   | L   | A   | S | P | P | G | K | W | H | K | A | D | V | T | F | D | S | N | T | A | F | E | S | L | V | V | S | P | D | K | K | T | V | K | N | V | G | V | P | Q | A | V | P | D | N | P | K | R | F | T | S | S | P | C | V | L | G   | S | P | G | F | Q | S | G | K | H | F | F | E | V | K | Y | G | S | Q | R | E | W | A | V | G | I | A | R | K | S | V | K | R | K | G | Y | L | K | L | V | P | K | E | W | I | W | Q | K | G | P | W | W | V | - | R | R | L | E | T | D | S | D | K | L | Q | K | G | S | G | K | I | V | V | F | L | D | Y | N | E | G | K | V | I | F | - | - | D | L | D | G | E | V | T | T | V | K | A | S | F | E | G | E | E | V | V | P | F | Y | Y | L | G | G | G | V | S | L | T | N | L | - | - |
| <i>M. l. carvalhoi</i>    | DN78252_c5_g1_i2 m.32582  | M | L  | L  | F  | T  | L  | C  | F  | F  | A  | D   | Q   | E   | N   | G   | W   | K   | A   | L   | A   | S | P | P | G | K | W | H | K | A | D | V | T | F | D | S | N | T | A | F | E | S | L | V | V | S | P | D | K | K | T | V | E | N | G | G | V | P | Q | A | V | P | D | N | P | K | R | F | T | S | S | P | C | V | L | G   | S | P | G | F | Q | S | G | K | H | F | F | E | V | K | Y | G | T | Q | R | E | W | A | V | G | L | A | R | K | S | V | K | R | K | G | Y | L | S | L | V | P | E | E | R | I | W | Q | K | G | L | W | W | L | - | Q | R | L | E | T | D | S | D | K | L | Q | K | G | S | G | K | I | V | V | F | L | D | Y | N | E | G | K | V | I | F | - | - | D | L | D | G | E | V | T | T | V | Q | A | S | F | E | G | E | E | V | V | P | F | Y | Y | L | G | G | G | V | S | L | T | N | L | - | - |
| <i>M. paraensis</i>       | DN86334_c55_g1_i2 m.18233 | M | L  | L  | F  | T  | L  | C  | F  | F  | A  | D   | Q   | E   | N   | G   | G   | K   | A   | L   | A   | S | P | P | G | K | W | H | K | A | D | V | T | F | D | S | N | T | A | F | K | S | L | V | V | S | P | D | K | K | T | V | E | N | V | G | V | P | Q | A | V | P | D | N | P | K | R | F | T | S | S | P | C | V | L | G   | S | P | G | F | K | S | G | K | H | F | F | E | V | K | Y | G | T | Q | R | E | W | A | V | G | L | A | G | K | S | V | K | R | K | G | Y | L | K | L | V | P | K | E | W | I | W | Q | K | G | P | W | W | V | - | R | R | L | E | T | D | S | D | K | L | Q | K | G | S | G | K | I | V | V | F | L | D | Y | N | E | G | K | V | I | F | - | - | D | L | D | G | E | V | T | T | V | K | A | S | F | E | G | E | E | V | V | P | F | Y | Y | L | G | G | G | V | S | L | T | N | L | - | - |
| <i>M. paraensis</i>       | DN86334_c55_g1_i1 m.18232 | M | L  | L  | F  | T  | L  | C  | F  | F  | A  | D   | Q   | E   | N   | G   | G   | K   | A   | L   | A   | S | P | P | G | K | W | H | K | A | D | V | T | F | D | S | N | T | A | F | A | S | L | V | V | S | P | D | K | K | T | V | E | N | V | G | V | P | Q | A | V | P | D | N | P | E | R | F | N | S | S | P | C | V | L | G</ |   |   |   |   |   |   |   |   |   |   |   |   |   |   |   |   |   |   |   |   |   |   |   |   |   |   |   |   |   |   |   |   |   |   |   |   |   |   |   |   |   |   |   |   |   |   |   |   |   |   |   |   |   |   |   |   |   |   |   |   |   |   |   |   |   |   |   |   |   |   |   |   |   |   |   |   |   |   |   |   |   |   |   |   |   |   |   |   |   |   |   |   |   |   |   |   |   |   |   |   |   |   |   |   |   |   |   |   |   |   |   |   |   |   |   |   |   |   |   |   |
