# Supplementary material for: Coralsnake Venomics: Analyses of Venom Gland Transcriptomes and Proteomes of Six Brazilian Taxa
Source: MDPI journal article supplement (doi:10.3390/toxins9060187), 2017-06-08
Supplement: s1 [file s1]

| Transcript ID     |                           | -10 | -1 | 1 | 10 | 20 | 30 | 40 | 50 | 60 | 70 | 80 | 90 | 100 | 110 | 120 | 130 | 140 | 150 | 160 | 170 | 180 | 190 | 200 | 210 | 220 | 230 |   |   |   |   |   |   |   |   |   |   |   |   |   |   |   |   |   |   |   |   |   |   |   |   |   |   |   |   |   |   |   |   |   |   |   |   |   |   |   |   |   |   |   |   |   |   |   |   |   |   |   |   |   |   |   |   |   |   |   |   |   |   |   |   |   |   |   |   |   |   |   |   |   |   |   |   |   |   |   |   |   |   |   |   |   |   |   |   |   |   |   |   |   |   |   |   |   |   |   |   |   |   |   |   |   |   |   |   |   |   |   |   |   |   |   |   |   |   |   |   |   |   |   |   |   |   |   |   |   |   |   |   |   |   |   |   |   |   |   |   |   |   |   |   |   |   |   |   |   |   |   |   |   |   |   |   |   |   |   |   |   |   |   |   |   |   |   |   |   |   |   |   |   |   |   |   |   |   |   |   |   |   |   |   |   |   |   |   |   |   |   |   |   |   |   |   |   |   |   |   |   |   |   |   |   |   |   |   |   |   |   |   |   |   |   |   |   |   |   |   |   |   |   |
|-------------------|---------------------------|-----|----|---|----|----|----|----|----|----|----|----|----|-----|-----|-----|-----|-----|-----|-----|-----|-----|-----|-----|-----|-----|-----|---|---|---|---|---|---|---|---|---|---|---|---|---|---|---|---|---|---|---|---|---|---|---|---|---|---|---|---|---|---|---|---|---|---|---|---|---|---|---|---|---|---|---|---|---|---|---|---|---|---|---|---|---|---|---|---|---|---|---|---|---|---|---|---|---|---|---|---|---|---|---|---|---|---|---|---|---|---|---|---|---|---|---|---|---|---|---|---|---|---|---|---|---|---|---|---|---|---|---|---|---|---|---|---|---|---|---|---|---|---|---|---|---|---|---|---|---|---|---|---|---|---|---|---|---|---|---|---|---|---|---|---|---|---|---|---|---|---|---|---|---|---|---|---|---|---|---|---|---|---|---|---|---|---|---|---|---|---|---|---|---|---|---|---|---|---|---|---|---|---|---|---|---|---|---|---|---|---|---|---|---|---|---|---|---|---|---|---|---|---|---|---|---|---|---|---|---|---|---|---|---|---|---|---|---|---|---|---|---|---|---|---|---|---|---|---|---|---|---|---|---|---|---|
| M. l. carvalhoi   | DN67860_c1_g2_i1 m.36803  | M   | N  | V | F  | S  | I  | F  | S  | L  | V  | F  | L  | A   | A   | F   | G   | S   | C   | A   | D   | D   | -   | R   | S   | P   | L   | R | E | C | F | R | E | A | D | Y | E | E | F | L | E | I | A | R | N | G | L | K | K | T | S | N | P | K | H | V | V | V | V | G | A | G | M | A | G | L | S | A | A | Y | V | L | A | G | A | G | H | K | V | T | L | L | E | A | S | K | I | V | G | G | R | V | R | T | H | R | N | D | L | E | G | W | H | V | N | L | G | P | M | R | L | P | E | R | H | R | I | R | E | Y | I | R | K | F | R | L | P | L | S | E | F | F | Q | E | N | E | N | A | W | Y | I | K | N | I | R | K | S | V | S | E | V | K | K | D | P | G | L | F | E | Y | P | V | K | P | S | E | K | G | K | S | A | S | Q | L | Y | Q | E | S | L | T | K | V | T | E | E | L | K | T | T | N | C | S | Y | I | L | N | K | Y | D | T | Y | S | T | K | E | Y | L | I | K | E | G | N | L | S | P | G | A | V | D | M | I | G | D | L | L | N | E | E | S | S | F | Y | L | S | F | I | E | S | L | K | S | D | D | I | F | S | Y |   |   |   |
| M. surinamensis   | DN57081_c0_g4_i1 m.39086  | M   | N  | V | F  | S  | I  | F  | S  | L  | V  | F  | L  | A   | A   | F   | G   | S   | C   | A   | D   | D   | R   | R   | -   | R   | R   | G | P | L | G | E | C | F | R | E | A | D | Y | E | E | F | L | E | I | A | R | N | G | L | N | E | T | S | N | P | K | H | V | V | V | V | G | A | G | M | A | G | L | S | A | A | Y | V | L | A | G | A | G | H | K | V | T | L | L | E | A | S | K | I | V | G | G | R | V | R | T | H | R | N | D | L | E | G | W | H | V | N | L | G | P | M | R | L | P | E | R | H | R | I | R | E | Y | I | R | K | F | D | L | P | L | R | E | F | V | Q | E | D | E | N | A | W | Y | I | K | N | T | R | K | R | A | S | E | V | K | K | D | P | G | L | F | E | Y | P | V | K | P | S | E | K | G | K | S | A | S | Q | L | Y | Q | E | S | L | T | K | V | T | E | E | L | K | M | T | N | C | S | Y | I | L | N | K | Y | D | T | Y | S | T | K | E | Y | L | I | K | E | G | N | L | S | P | G | A | I | D | M | I | G | D | F | L | N | E | E | S | S | F | Y | L | S | F | I | E | S | L | K | S | D | D | I | F | S | Y |
| M. corallinus     | DN51373_c2_g1_i1 m.37282  | M   | N  | V | F  | S  | I  | F  | S  | L  | V  | F  | L  | A   | A   | F   | G   | S   | C   | A   | D   | D   | R   | R   | -   | R   | R   | G | P | L | G | E | C | F | R | E | A | D | Y | E | E | F | L | E | I | A | R | N | G | L | N | E | T | S | N | P | K | H | V | V | V | V | G | A | G | M | A | G | L | S | A | A | Y | V | L | A | G | A | G | H | K | V | T | L | L | E | A | S | K | I | V | G | G | R | V | R | T | H | R | N | D | L | E | G | W | H | V | N | L | G | P | M | R | L | P | E | R | H | R | I | R | E | Y | I | R | K | F | D | L | P | L | R | E | F | V | Q | E | D | E | N | A | W | Y | I | K | N | T | R | K | R | A | S | E | V | K | K | D | P | G | L | F | E | Y | P | V | K | P | S | E | K | G | K | S | A | S | Q | L | Y | Q | E | S | L | T | K | V | T | E | E | L | K | M | T | N | C | S | Y | I | L | N | K | Y | D | T | Y | S | T | K | E | Y | L | I | K | E | G | N | L | S | P | G | A | I | D | M | I | G | D | F | L | N | E | E | S | S | F | Y | L | S | F | I | E | S | L | K | S | D | D | I | F | S | Y |
| M. paraensis      | DN81361_c0_g15_i1 m.18886 | M   | N  | V | F  | S  | I  | F  | S  | L  | V  | F  | L  | A   | A   | F   | G   | S   | C   | A   | D   | D   | R   | R   | -   | R   | R   | G | P | L | G | E | C | F | R | E | A | D | Y | E | E | F | L | E | I | A | R | N | G | L | N | E | T | S | N | P | K | H | V | V | V | V | G | A | G | M | A | G | L | S | A | A | Y | V | L | A | G | A | G | H | K | V | T | L | L | E | A | S | K | I | V | G | G | R | V | R | T | H | R | N | D | L | E | G | W | H | V | N | L | G | P | M | R | L | P | E | R | H | R | I | R | E | Y | I | R | K | F | D | L | P | L | R | E | F | V | Q | E | D | E | N | A | W | Y | I | K | N | T | R | K | R | A | S | E | V | K | K | D | P | G | L | F | E | Y | P | V | K | P | S | E | K | G | K | S | A | S | Q | L | Y | Q | E | S | L | T | K | V | T | E | E | L | K | M | T | N | C | S | Y | I | L | N | K | Y | D | T | Y | S | T | K | E | Y | L | I | K | E | G | N | L | S | P | G | A | I | D | M | I | G | D | F | L | N | E | E | S | S | F | Y | L | S | F | I | E | S | L | K | S | D | D | I | F | S | Y |
| M. spixii         | DN73501_c0_g2_i1 m.38292  | M   | N  | V | F  | S  | I  | F  | S  | L  | V  | F  | L  | A   | A   | F   | G   | S   | C   | A   | D   | D   | R   | R   | -   | R   | R   | G | P | L | G | E | C | F | R | E | A | D | Y | E | E | F | L | E | I | A | R | N | G | L | N | E | T | S | N | P | K | H | V | V | V | V | G | A | G | M | A | G | L | S | A | A | Y | V | L | A | G | A | G | H | K | V | T | L | L | E | A | S | K | I | V | G | G | R | V | R | T | H | R | N | D | L | E | G | W | H | V | N | L | G | P | M | R | L | P | E | R | H | R | I | R | E | Y | I | R | K | F | D | L | P | L | R | E | F | V | Q | E | D | E | N | A | W | Y | I | K | N | T | R | K | R | A | S | E | V | K | K | D | P | G | L | F | E | Y | P | V | K | P | S | E | K | G | K | S | A | S | Q | L | Y | Q | E | S | L | T | K | V | T | E | E | L | K | M | T | N | C | S | Y | I | L | N | K | Y | D | T | Y | S | T | K | E | Y | L | I | K | E | G | N | L | S | P | G | A | I | D | M | I | G | D | F | L | N | E | E | S | S | F | Y | L | S | F | I | E | S | L | K | S | D | D | I | F | S | Y |
| M. l. lemniscatus | DN120559_c3_g1_i1 m.34494 | M   | N  | V | F  | S  | I  | F  | S  | L  | V  | F  | L  | A   | A   | F   | G   | S   | C   | A   | D   | D   | R   | R   | -   | R   | R   | G | P | L | G | E | C | F | R | E | A | D | Y | E | E | F | L | E | I | A | R | N | G | L | N | E | T | S | N | P | K | H | V | V | V | V | G | A | G | M | A | G | L | S | A | A | Y | V | L | A | G | A | G | H | K | V | T | L | L | E | A | S | K | I | V | G | G | R | V | R | T | H | R | N | D | L | E | G | W | H | V | N | L | G | P | M | R | L | P | E | R | H | R | I | R | E | Y | I | R | K | F | D | L | P | L | R | E | F | V | Q | E | D | E | N | A | W | Y | I | K | N | T | R | K | R | A | S | E | V | K | K | D | P | G | L | F | E | Y | P | V | K | P | S | E | K | G | K | S | A | S | Q | L | Y | Q | E | S | L | T | K | V | T | E | E | L | K | M | T | N | C | S | Y | I | L | N | K | Y | D | T | Y | S | T | K | E | Y | L | I | K | E | G | N | L | S | P | G | A | V | D | M | I | G | D | L | L | N | E | E | S | S | F | Y | L | S | F | I | E | S | L | K | S | D | D | I | F | S | Y |
| M. fulvius        | LAO 1a JAB52830.1         | M   | N  | V | F  | S  | I  | F  | S  | L  | V  | F  | L  | A   | A   | F   | G   | S   | C   | A   | D   | D   | R   | R   | -   | R   | R   | G | P | L | G | E | C | F | R | E | A | D | Y | E | E | F | L | E | I | A | R | N | G | L | T | H | T | S | N | P | K | H | V | V | V | V | G | A | G | M | A | G | L | S | A | A | Y | V | L | A | G | A | G | H | K | V | T | L | L | E | A | S | K | I | V | G | G | R | V | R | T | H | R | N | D | L | E | G | W | H | V | N | L | G | P | M | R | L | P | E | R | H | R | I | R | E | Y | I | R | K | F | D | L | P | L | R | E | F | V | Q | E | D | E | N | A | W | Y | I | K | N | T | R | K | R | A | S | E | V | K | K | D | P | G | L | F | E | Y | P | V | K | P | S | E | K | G | K | S | A | S | Q | L | Y | Q | E | S | L | T | K | V | T | E | E | L | K | M | T | N | C | S | Y | I | L | N | K | Y | D | T | Y | S | T | K | E | Y | L | I | K | E | G | N | L | S | P | G | A | I | D | M | I | G | D | F | L | N | E | E | S | S | F | Y | L | S | F | I | E | S | L | K | S | D | D | I | F | S | Y |
| M. tener          | LAO 1a JAS05153.1         | M   | N  | V | F  | S  | I  | F  | S  | L  | V  | F  | L  | A   | A   | F   | G   | S   | C   | A   | D   | D   | R   | R   | -   | R   | R   | G | P | L | G | E | C | F | R | E | A | D | Y | E | E | F | L | E | I | A | R | N | G | L | T | H | T | S | N | P | K | H | V | V | V | V | G | A | G | M | A | G | L | S | A | A | Y | V | L | A | G | A | G | H | K | V | T | L | L | E | A | S | K | I | V | G | G | R | V | R | T | H | R | N | D | L | E | G | W | H | V | N | L | G | P | M | R | L | P | E | R | H | R | I | R | E | Y | I | R | K | F | D | L | P | L | R | E | F | V | Q | E | D | E | N | A | W | Y | I | K | N | T | R | K | R | A | S | E | V | K | K | D | P | G | L | F | E | Y | P | V | K | P | S | E | K | G | K | S | A | S | Q | L | Y | Q | E | S | L | T | K | V | T | E | E | L | K | M | T | N | C | S | Y | I | L | N | K | Y | D | T | Y | S | T | K | E | Y | L | I | K | E | G | N | L | S | P | G | A | V | D | M | I | G | D | L | L | N | E | E | S | S | F | Y | L | S | F | I | E | S | L | K | S | D | D | I | F | S | Y |
| M. spixii         | DN100626_c9_g1_i1 m.22936 | M   | N  | V | F  | S  | I  | F  | S  | L  | V  | F  | L  | A   | A   | F   | G   | S   | C   | A   | D   | D   | R   | R   | -   | R   | R   | G | P | L | G | E | C | F | R | E | A | D | Y | E | E | F | L | E | I | A | R | N | G | L | K | K | T | S | N | P | K | H | V | V | V | V | G | A | G | M | A | G | L | S | A | A | Y | V | L | A | G | A | G | H | K | V | T | L | L | E | A | S | K | I | V | G | G | R | V | R | T | H | R | N | D | L | E | G | W | H | V | N | L | G | P | M | R | L | P | E | R | H | R | I | R | E | Y | I | R | K | F | D | L | P | L | R | E | F | V | Q | E | D | E | N | A | W | Y | I | K | N | T | R | K | R | A | S | E | V | K | K | D | P | G | L | F | E | Y | P | V | K | P | S | E | K | G | K | S | A | S | Q | L | Y | Q | E | S | L | T | K | V | T | E | E | L | K | M | T | N | C | S | Y | I | L | N | K | Y | D | T | Y | S | T | K | E | Y | L | I | K | E | G | N | L | S | P | G | A | V | D | M | I | G | D | L | L | N | E | E | S | S | F | Y | L | S | F | I | E | S | L | K | S | D | D | I | F | S | Y |
| M. surinamensis   | DN77443_c8_g26_i3 m.3894  | M   | N  | V | F  | S  | I  | F  | S  | L  | V  | F  | L  | A   | A   | F   | G   | S   | C   | A   | D   | D   | R   | R   | -   | R   | R   | G | P | L | G | E | C | F | R | E | A | D | Y | E | E | F | L | E | I | A | R | N | G | L | K | K | T | S | N | P | K | H | V | V | V | V | G | A | G | M | A | G | L | S | A | A | Y | V | L | A | G | A | G | H | K | V | T | L |   |   |   |   |   |   |   |   |   |   |   |   |   |   |   |   |   |   |   |   |   |   |   |   |   |   |   |   |   |   |   |   |   |   |   |   |   |   |   |   |   |   |   |   |   |   |   |   |   |   |   |   |   |   |   |   |   |   |   |   |   |   |   |   |   |   |   |   |   |   |   |   |   |   |   |   |   |   |   |   |   |   |   |   |   |   |   |   |   |   |   |   |   |   |   |   |   |   |   |   |   |   |   |   |   |   |   |   |   |   |   |   |   |   |   |   |   |   |   |   |   |   |   |   |   |   |   |   |   |   |   |   |   |   |   |   |   |   |   |   |   |   |   |   |   |   |   |   |   |   |   |   |   |   |   |   |   |   |   |   |   |   |   |   |   |   |
