# Supplementary material for: Coralsnake Venomics: Analyses of Venom Gland Transcriptomes and Proteomes of Six Brazilian Taxa
Source: MDPI journal article supplement (doi:10.3390/toxins9060187), 2017-06-08
Supplement: s1 [file s1]

|                                   |                            |   |   |   |   |   |   |   |   |   |   |   |   |   |   |   |   |   |   |   |   |   |   |   |   |   |   |   |   |   |   |   |   |   |   |   |   |   |   |   |   |   |   |   |   |   |   |   |   |   |   |   |   |   |   |   |   |   |   |   |   |   |   |   |   |   |   |   |   |   |   |   |   |   |   |   |   |   |   |   |   |   |   |   |   |   |   |   |   |   |   |   |   |   |   |   |   |   |   |   |   |   |   |   |   |   |   |   |   |   |   |   |   |   |   |   |   |   |   |   |   |   |   |   |   |   |   |   |   |   |   |   |   |   |   |   |   |   |   |   |   |   |   |   |   |   |   |   |   |   |   |   |   |   |   |   |   |   |   |   |   |   |   |   |   |   |   |   |   |   |   |   |   |   |   |   |   |   |   |   |   |   |   |   |   |   |   |   |   |   |   |   |   |   |   |   |   |   |   |   |   |   |   |   |   |   |   |   |   |   |   |   |   |   |   |   |   |   |   |   |   |   |   |   |   |   |   |   |   |   |   |   |   |   |   |   |   |   |   |   |   |   |   |   |   |   |   |   |   |
|-----------------------------------|----------------------------|---|---|---|---|---|---|---|---|---|---|---|---|---|---|---|---|---|---|---|---|---|---|---|---|---|---|---|---|---|---|---|---|---|---|---|---|---|---|---|---|---|---|---|---|---|---|---|---|---|---|---|---|---|---|---|---|---|---|---|---|---|---|---|---|---|---|---|---|---|---|---|---|---|---|---|---|---|---|---|---|---|---|---|---|---|---|---|---|---|---|---|---|---|---|---|---|---|---|---|---|---|---|---|---|---|---|---|---|---|---|---|---|---|---|---|---|---|---|---|---|---|---|---|---|---|---|---|---|---|---|---|---|---|---|---|---|---|---|---|---|---|---|---|---|---|---|---|---|---|---|---|---|---|---|---|---|---|---|---|---|---|---|---|---|---|---|---|---|---|---|---|---|---|---|---|---|---|---|---|---|---|---|---|---|---|---|---|---|---|---|---|---|---|---|---|---|---|---|---|---|---|---|---|---|---|---|---|---|---|---|---|---|---|---|---|---|---|---|---|---|---|---|---|---|---|---|---|---|---|---|---|---|---|---|---|---|---|---|---|---|---|---|---|---|---|---|---|---|
| <i>Protobothrops elegans</i>      | 5NUC_BAP39925.1            | V | K | G | V | D | V | V | V | G | H | T | N | T | F | L | Y | T | G | S | P | P | S | T | E | V | A | A | G | N | Y | P | F | M | V | Q | S | D | D | G | R | Q | V | P | V | V | Q | A | Y | A | F | G | K | Y | L | G | Y | L | N | V | I | F | D | D | K | G | N | V | I | K | A | S | G | N | P | I | L | L | N | K | D | I | S | E | D | Q | D | V | K | A | E | V | N | K | M | K | I | Q | L | R | N | Y | S | S | Q | E | I | G | K | T | I | V | Y | L | N | G | T | T | Q | A | C | R | F | H | E | C | N | L | G | N | L | I | C | D | A | V | I | Y | N | N | V | R | H | P | D | D | N | E | W | N | H | V | S | M | C | I | V | N | G | G | I | R | S | P | I | D | E | R | T | N | N | G | T | I | T | L | E | E | L | T | A | V | L | P | F | G | G | T | F | D | L | L | Q | I | K | G | C | A | L | K | Q | A | F | E | H | S | V | H | R | H | G | Q | G | M | G | E | L | L | Q | V | S | G | I | K | V | V | Y | D | L | S | R | K | P | G | N | R | V | V | S | L | N | V | L | C | T | E | C | R | V |
| <i>Protobothrops flavoviridis</i> | 5NUC_BAP39972.1            | V | K | G | V | D | V | V | V | G | H | T | N | T | F | L | Y | T | G | S | P | P | S | T | E | V | A | A | G | N | Y | P | F | M | V | Q | S | D | D | G | R | Q | V | P | V | V | Q | A | Y | A | F | G | K | Y | L | G | Y | L | N | V | I | F | D | D | K | G | N | V | I | K | A | S | G | N | P | I | L | L | N | K | D | I | S | E | D | Q | D | V | K | A | E | V | N | K | M | K | I | Q | L | R | N | Y | S | S | Q | E | I | G | K | T | I | V | Y | L | N | G | T | T | Q | A | C | R | F | H | E | C | N | L | G | N | L | I | C | D | A | V | I | Y | N | N | V | R | H | P | D | D | N | E | W | N | H | V | S | M | C | I | V | N | G | G | I | R | S | P | I | D | E | R | T | N | N | G | T | I | T | L | E | E | L | T | A | V | L | P | F | G | G | T | F | D | L | L | Q | I | K | G | C | A | L | K | Q | A | F | E | H | S | V | H | R | H | G | Q | G | M | G | E | L | L | Q | V | S | G | I | K | V | V | Y | D | L | S | R | K | P | G | N | R | V | V | S | L | N | V | L | C | T | E | C | R | V |
| <i>M. fulvius</i>                 | 5NUC_1_JAB52815.1          | V | K | G | V | D | V | V | V | G | H | T | N | T | F | L | Y | T | G | S | P | P | S | N | E | V | P | A | G | N | Y | P | F | M | Q | L | S | D | D | G | R | Q | V | P | V | V | Q | A | Y | A | F | G | K | Y | L | G | Y | L | N | V | I | F | D | D | K | G | K | V | I | K | A | S | G | N | P | I | L | L | N | K | S | I | Q | E | D | P | A | V | K | A | E | V | S | R | M | K | V | Q | L | Q | K | Y | S | K | Q | E | I | G | K | T | I | V | Y | L | N | G | T | T | H | A | C | R | F | H | E | C | N | L | G | N | L | I | C | D | A | V | V | Y | N | N | L | R | H | P | D | D | N | E | W | N | H | V | S | M | C | I | V | N | G | G | I | R | S | P | I | D | E | K | A | N | N | G | I | I | T | L | E | E | L | T | A | V | L | P | F | G | G | T | F | D | L | L | Q | I | K | G | S | A | L | R | Q | A | F | E | H | S | V | H | R | H | G | Q | G | T | G | E | L | L | Q | V | S | G | I | K | V | L | Y | D | L | S | Q | K | P | G | K | R | V | V | S | L | N | V | L | C | T | E | C | R | V |
| <i>M. tener</i>                   | 5NUC_JAS05143.1            | V | K | G | V | D | V | V | V | G | H | T | N | T | F | L | Y | T | G | S | P | P | S | N | E | V | P | A | G | N | Y | P | F | M | Q | L | S | D | D | G | R | Q | V | P | V | V | Q | A | Y | A | F | G | K | Y | L | G | Y | L | N | V | I | F | D | D | K | G | K | V | I | K | A | S | G | N | P | I | L | L | N | K | S | I | Q | E | D | P | A | V | K | A | E | V | S | R | M | K | V | Q | L | Q | K | Y | S | K | Q | E | I | G | K | T | I | V | Y | L | N | G | T | T | H | A | C | R | F | H | E | C | N | L | G | N | L | I | C | D | A | V | V | Y | N | N | L | R | H | P | D | D | N | E | W | N | H | V | S | M | C | I | V | N | G | G | I | R | S | P | I | D | E | K | A | N | N | G | I | I | T | L | E | E | L | T | A | V | L | P | F | G | G | T | F | D | L | L | Q | I | K | G | S | A | L | R | Q | A | F | E | H | S | V | H | R | H | G | Q | G | T | G | E | L | L | Q | V | S | G | I | K | V | L | Y | D | L | S | Q | K | P | G | K | R | V | V | S | L | N | V | L | C | T | E | C | R | V |
| <i>M. paraensis</i>               | DN84764_c2_g1_i1 m.28823   | V | K | G | V | D | V | V | V | G | H | T | N | T | F | L | Y | T | G | S | P | P | S | N | E | V | A | A | G | N | Y | P | F | M | Q | L | S | D | D | G | R | Q | V | P | V | V | Q | A | Y | A | F | G | K | Y | L | G | Y | L | N | V | I | F | D | D | K | G | K | V | I | K | A | S | G | N | P | I | L | L | K | S | I | Q | E | D | P | A | V | K | A | E | V | S | R | M | K | V | Q | L | Q | K | Y | S | K | Q | E | I | G | K | T | I | V | Y | L | N | G | T | T | H | A | C | R | F | H | E | C | N | L | G | N | L | I | C | D | A | V | V | Y | N | N | L | R | H | P | D | D | N | E | W | N | H | V | S | M | C | I | V | N | G | G | I | R | S | P | I | D | E | K | A | N | N | G | I | I | T | L | E | E | L | T | A | V | L | P | F | G | G | T | F | D | L | L | Q | I | K | G | S | A | L | R | Q | A | F | E | H | S | V | R | R | H | G | Q | G | T | G | E | L | L | Q | V | S | G | I | K | V | L | Y | D | L | S | Q | K | P | G | K | R | V | V | S | L | N | V | L | C | T | E | C | R | V |   |
| <i>M. spixii</i>                  | DN9908_c5_g7_i3 m.50716    | V | K | D | V | D | V | V | V | G | H | T | N | T | F | L | Y | T | G | S | P | P | S | N | E | V | A | A | G | N | Y | P | F | M | Q | L | S | D | D | G | R | Q | V | P | V | V | Q | A | Y | A | F | G | K | Y | L | G | Y | L | N | V | I | F | D | D | K | G | K | V | I | K | A | S | G | N | P | I | L | L | N | E | S | I | Q | E | D | P | A | V | K | A | E | V | S | R | M | K | V | Q | L | Q | N | Y | S | S | Q | E | I | G | K | T | I | V | Y | L | N | G | T | T | H | A | C | R | F | H | E | C | N | L | G | N | L | I | C | D | A | V | V | Y | N | N | L | R | H | P | D | D | N | E | W | N | H | V | S | M | C | I | V | N | G | G | I | R | S | P | I | D | E | Q | A | N | N | G | I | I | T | L | E | E | L | T | A | V | L | P | F | G | G | T | F | D | L | L | Q | I | K | G | S | T | L | R | Q | A | F | E | H | S | V | H | R | H | G | Q | G | S | G | E | L | L | Q | V | S | G | I | K | V | L | Y | D | L | S | Q | K | P | G | K | R | V | V | S | L | N | V | L | C | T | E | C | R | V |
| <i>M. surinamensis</i>            | DN77401_c2_g1_i1 m.41644   | V | K | D | V | D | V | V | V | G | H | T | N | T | F | L | Y | T | G | S | P | P | S | N | E | V | A | A | G | N | Y | P | F | M | Q | L | S | D | D | G | R | Q | V | P | V | V | Q | A | Y | A | F | G | K | Y | L | G | Y | L | N | V | T | F | D | D | K | G | K | V | I | K | A | S | G | N | P | I | L | L | N | E | S | I | Q | E | D | P | A | V | K | A | E | V | S | R | M | K | V | Q | L | Q | N | Y | S | S | Q | E | I | G | K | T | I | V | Y | L | N | G | T | T | H | A | C | R | F | H | E | C | N | L | G | N | L | I | C | D | A | V | V | Y | N | N | L | R | H | P | D | D | N | E | W | N | H | V | S | M | C | I | V | N | G | G | I | R | S | P | I | D | E | Q | A | N | N | G | I | I | T | L | E | E | L | T | A | V | L | P | F | G | G | T | F | D | L | L | Q | I | K | G | S | T | L | R | Q | A | F | E | H | S | V | H | R | H | G | Q | G | S | G | E | L | L | Q | V | S | G | I | K | V | L | Y | D | L | S | Q | K | P | G | K | R | V | V | S | L | N | V | L | C | T | E | C | R | V |
| <i>M. l. carvalhoi</i>            | DN75891_c0_g2_i1 m.4601 v2 | V | K | D | V | D | V | V | V | G | H | T | N | T | F | L | Y | T | G | S | P | P | S | N | E | V | A | A | G | N | Y | P | F | M | Q | L | S | D | D | G | R | Q | V | P | V | V | Q | A | Y | A | F | G | K | Y | L | G | Y | L | N | V | T | F | D | D | K | G | K | V | I | K | A | S | G | N | P | I | L | L | N | K | S | I | Q | E | D | P | A | V | K | A | E | V | S | R | M | K | V | Q | L | Q | N | Y | S | S | Q | E | I | G | K | T | I | V | Y | L | N | G | T | T | H | A | C | R | F | H | E | C | N | L | G | N | L | I | C | D | A | V | V | Y | N | N | L | R | H | P | D | D | N | E | W | N | H | V | S | M | C | I | V | N | G | G | I | R | S | P | I | D | E | K | A | N | N | G | I | I | T | L | E | E | L | T | A | V | L | P | F | G | G | T | F | D | L | L | Q | I | K | G | S | A | L | R | Q | A | F | E | H | S | V | R | R | H | G | Q | G | T | G | E | L | L | Q | V | S | G | I | K | V | L | Y | D | L | S | Q | K | P | G | K | R | V | V | S | L | N | V | L | C | T | E | C | R | V |
| <i>M. corallinus</i>              | DN100518_c4_g4_i1 m.7768   | V | K | D | V | D | V | V | V | G | H | T | N | T | F | L | Y | T | G | S | P | P | S | N | E | V | A | A | G | N | Y | P | F | M | Q | L | S | D | D | G | R | Q | V | P | V | V | Q | A | Y | A | F | G | K | Y | L | G | Y | L | N | V | T | F | D | D | K | G | K | V | I | K | A | S | G | N | P | I | L | L | N | E | N | I | Q | E | D | P | A | V | K | A | E | V | S | R | M | K | V | Q | L | Q | N | Y | S | S | Q | E | I | G | K | T | I | V | Y | L | N | G | T | T | H | A | C | R | F | H | E | C | N | L | G | N | L | I | C | D | A | V | V | Y | N | N | L | R | H | P | D | D | N | E | W | N | H | V | S | M | C | I | V | N | G | G | I | R | S | P | I | D | E | Q | A | N | N | G | I | I | T | L | E | E | L | T | A | V | L | P | F | G | G | T | F | D | L | L | Q | I | K | G | S | T | L | R | Q | A | F | E | H | S | V | H | R | H | G | Q | G | S | G | E | L | L | Q | V | S | G | I | K | V | L | Y | D | L | S | Q | K | P | G | K | R | V | V | S | L | N | V | L | C | T | E | C | R | V |
| <i>M. l. lemniscatus</i>          | DN121987_c0_g4_i5 m.44381  | V | K | D | V | D | V | V | V | G | H | T | N | T | F | L | Y | T | G | S | P | P | S | N | E | V | A | A | G | N | Y | P | F | V | Q | L | S | D | D | G | R | Q | V | P | V | V | Q | A | Y | A | F | G | K | Y | L | G | Y | L | N | V | T | F | D | D | K | G | K | V | I | K | A | S | G | N | P | I | L | L | N | E | N | I | Q | E | D | P | A | V | K | A | E | V | S | R | M | K | V | Q | L | Q | N | Y | S | S | Q | E | I | G | K | T | I | V | Y | L | N | G | T | T | H | A | C | R | F | H | E | C |   |   |   |   |   |   |   |   |   |   |   |   |   |   |   |   |   |   |   |   |   |   |   |   |   |   |   |   |   |   |   |   |   |   |   |   |   |   |   |   |   |   |   |   |   |   |   |   |   |   |   |   |   |   |   |   |   |   |   |   |   |   |   |   |   |   |   |   |   |   |   |   |   |   |   |   |   |   |   |   |   |   |   |   |   |   |   |   |   |   |   |   |   |   |   |   |   |   |   |   |   |   |   |   |   |   |   |   |   |   |   |   |   |   |   |   |   |   |   |   |   |   |   |
