# Supplementary material for: Coralsnake Venomics: Analyses of Venom Gland Transcriptomes and Proteomes of Six Brazilian Taxa
Source: MDPI journal article supplement (doi:10.3390/toxins9060187), 2017-06-08
Supplement: s1 [file s1]

| Species            | Transcript ID                | Cysteines | -20                                                                                                                                                                                                                       | -10                                                                                                                                                                                                                       | 1                                                                                                                                                                                                                           | 10                                                                                                                                            | 20                                                                                                                                            | #                                                       | #         | #         | #         | #         | #         | #         | #         | 100                                                                                                                                           | 110                                                                                                                                           | 120                                                                                                                                           | 130                                                                                                                                           | 140       | 150       | 160 |
|--------------------|------------------------------|-----------|---------------------------------------------------------------------------------------------------------------------------------------------------------------------------------------------------------------------------|---------------------------------------------------------------------------------------------------------------------------------------------------------------------------------------------------------------------------|-----------------------------------------------------------------------------------------------------------------------------------------------------------------------------------------------------------------------------|-----------------------------------------------------------------------------------------------------------------------------------------------|-----------------------------------------------------------------------------------------------------------------------------------------------|---------------------------------------------------------|-----------|-----------|-----------|-----------|-----------|-----------|-----------|-----------------------------------------------------------------------------------------------------------------------------------------------|-----------------------------------------------------------------------------------------------------------------------------------------------|-----------------------------------------------------------------------------------------------------------------------------------------------|-----------------------------------------------------------------------------------------------------------------------------------------------|-----------|-----------|-----|
| M. l. lemniscatus  | DN80788_c0_g1_i1 m.61227     | 6         | M G L F T Y F S L C F L - -                                                                                                                                                                                               | G L L I A N P F L E A E A D T C A R E W L Q N Q G N C Y A Y F D H K L T W Q E A E I E C Q S Y G R G A H L A S I L T K A E T L L V A E H I S - Y Q Q E L S N V W I G L Q D V R Q - - - -                                   | T G K W R W A D E S T Y N Y K A - -                                                                                                                                                                                         | W M K S Q P D N Y G N A E H C V E L R L S T - -                                                                                               | G F K E W N D S P C Q K L N A Y I C K - - - -                                                                                                 |                                                         |           |           |           |           |           |           |           |                                                                                                                                               |                                                                                                                                               |                                                                                                                                               |                                                                                                                                               |           |           |     |
| M. surinamensis    | DN56797_c0_g2_i1 m.17454     | (6)       | - - - - -                                                                                                                                                                                                                 | - - - - -                                                                                                                                                                                                                 | - - - - -                                                                                                                                                                                                                   | - - - - -                                                                                                                                     | - - - - -                                                                                                                                     | - - - - -                                               | - - - - - | - - - - - | - - - - - | - - - - - | - - - - - | - - - - - | - - - - - | K L I W E W I D G T T Y T P G T L L W D N R A P S T A L S T A E C I S M T N I Q I P G N A V R W I Q R T C A T V L P F V C K Y R S S F - - - - | K L I W E W I D G T T Y T P G T L L W D N R A P S T A L S T A E C I S M T N I Q I P G N A V R W I Q R T C A T V L P F V C K Y R S S F - - - - | K L I W E W I D G T T Y T P G T L L W D N R A P S T S L S T A E C I S V T N I H I P G N A A R W I Q R T C A T A L P F I C K F R S S F - - - - | K L I W E W I D G T T Y T P G T L L W D N R A P S T S L S T A E C I S V T N I H I P G N A A R W I Q R T C A T A L P F I C K F R S S F - - - - |           |           |     |
| M. l. lemniscatus  | DN105836_c0_g1_i1 m.13921    | 6         | M G H H A F W G F C L L A C L P V T S L V P G I Q R G A - K C P E E A I Y Y R N Y C Y Q L V D M S L A W D A A E I E C Q H L R P G A H L A T I R T A T E E K I V S S Y I R - R S S T T A D A W I G M H A V R T P K - - - - | M G H H A F W G F C L L A C L P M T S L V P G I Q R G A - K C P E E A I Y Y R N Y C Y Q L V D M S L A W D A A E I E C Q H L R P G A H L A T I R T A T E E R I A S S H I R - R S S T T T D A W I G M H A V R T P K - - - - | K L I W E W I D G T T Y T P G T L L W D N R A P S T S L S T A E C I S M T N I H I P G N A A R W I Q R T C A T A L P F I C K Y R S S F - - - -                                                                               | K L I W E W I D G T T Y T P G T L L W D N R A P S T S L S T A E C I S M T N I H I P G N A A R W I Q R T C A T A L P F I C K Y R S S F - - - - | K L I W E W I D G T T Y T P G T L L W D N R A P S T S L S T A E C I S M T N I H I P G N A A R W I Q R T C A T A L P F I C K Y R S S F - - - - |                                                         |           |           |           |           |           |           |           |                                                                                                                                               |                                                                                                                                               |                                                                                                                                               |                                                                                                                                               |           |           |     |
| M. spixii          | DN77538_c0_g1_i1 m.45647     | 6         | M G H H A F W G F C L L A C L S V T P L V E G V Q R G A - K C P E E A I Y Y R R Y C Y Q L V D M S F T W D A A E T E C Q H L R P G A H L A T L R T A A E E R I V S S H I R - R S S T A T D A W I G M H A V R T P K - - - - | M G H H A F W G F C L L A C L S V T P L V E G I Q R G A - K C P E E A I Y Y R R Y C Y Q L V D M S L T W D A A E T E C Q H L R P G A H L A T L R T A A E E R I V S S H I R - R S S T A T D A W I G M H A V R T P K - - - - | K L I W E W I D G T T Y T P G T L L W D N R A P S T S L S T A E C I S V T N I H I P G N A A R W I Q R T C A T A L P F I C K F R S S F - - - -                                                                               | K L I W E W I D G T T Y T P G T L L W D N R A P S T S L S T A E C I S V T N I H I P G N A A R W I Q R T C A T A L P F I C K F R S S F - - - - | K L I W E W I D G T T Y T P G T L L W D N R A P S T S L S T A E C I S V T N I H I P G N A A R W I Q R T C A T A L P F I C K F R S S F - - - - |                                                         |           |           |           |           |           |           |           |                                                                                                                                               |                                                                                                                                               |                                                                                                                                               |                                                                                                                                               |           |           |     |
| M. tener           | CTL 2 JAS05175.1             | 6         | M G H H A F W G F C L L A C L S V T P L V E G V Q R G A - K C P E E A I Y Y R R Y C Y Q L V D M S F T W D A A E T E C Q H L R P G A H L A T L R T A A E E R I V S S H I R - R S S T A T D A W I G M H A V R T P K - - - - | M G H H A F W G F C L L A C L S V T P L V E G I Q R G A - K C P E E A I Y Y R R Y C Y Q L V D M S L T W D A A E T E C Q H L R P G A H L A T L R T A A E E R I V S S H I R - R S S T A T D A W I G M H A V R T P K - - - - | K L I W E W I D G T T Y T P G T L L W D N R A P S T S L S T A E C I S V T N I H I P G N A A R W I Q R T C A T A L P F I C K F R S S F - - - -                                                                               | K L I W E W I D G T T Y T P G T L L W D N R A P S T S L S T A E C I S V T N I H I P G N A A R W I Q R T C A T A L P F I C K F R S S F - - - - | K L I W E W I D G T T Y T P G T L L W D N R A P S T S L S T A E C I S V T N I H I P G N A A R W I Q R T C A T A L P F I C K F R S S F - - - - |                                                         |           |           |           |           |           |           |           |                                                                                                                                               |                                                                                                                                               |                                                                                                                                               |                                                                                                                                               |           |           |     |
| M. corallinus      | DN88827_c0_g1_i1 m.28085     | 6         | M G H H A F W G F C L L A C L S V T P L V E G I Q R G A - K C P E E A I Y Y R R Y C Y Q L V D M S L T W D A A E T E C Q H L R P G A H L A T L R T A A E E R I V S S H I R - R S S T A T D A W I G M H A V R T P K - - - - | M G H H A F W G F C L L A C L S V T P L V E G I Q R G A - K C P E E A I Y Y R R Y C Y Q L V D M S L T W D A A E T E C Q H L R P G A H L A T L R T A A E E R I V S S H I R - R S S T A T D A W I G M H A V R T P K - - - - | K L I W E W I D G T T Y T P G T L L W D N R A P S T S L S T A E C I S V T N I H I P G N A A R W I Q R T C A T A L P F I C K F R S S F - - - -                                                                               | K L I W E W I D G T T Y T P G T L L W D N R A P S T S L S T A E C I S V T N I H I P G N A A R W I Q R T C A T A L P F I C K F R S S F - - - - | K L I W E W I D G T T Y T P G T L L W D N R A P S T S L S T A E C I S V T N I H I P G N A A R W I Q R T C A T A L P F I C K F R S S F - - - - |                                                         |           |           |           |           |           |           |           |                                                                                                                                               |                                                                                                                                               |                                                                                                                                               |                                                                                                                                               |           |           |     |
| M. l. carvalhoi    | DN56178_c0_g2_i1 m.34879     | 6         | - - - - F L S F G L L - - -                                                                                                                                                                                               | V V A L C L R G T G A D P - Q C P F D W S S Y N G H C Y K V F K D L K S W H D A E M T C R Q Q E E G S H L V S I Q S W A E S V Y V A S L V S - R R V F L I N V W I G L S D W W K - - - -                                   | Q H T W Y W S D G S K F R Y K S - -                                                                                                                                                                                         | W K L G E P N N F L W N E Y C V E L C S F S - -                                                                                               | G Y L R W N D Q Y C M S W R Y F V C K F Q - - - -                                                                                             |                                                         |           |           |           |           |           |           |           |                                                                                                                                               |                                                                                                                                               |                                                                                                                                               |                                                                                                                                               |           |           |     |
| M. l. lemniscatus  | DN115442_c1_g1_i1 m.56338    | 6         | - - - - F L S F G L L - - -                                                                                                                                                                                               | V V A L C L R G T G A D P - Q C P F D W S S Y N G H C Y K V F K D L K S W H D A E M T C R Q Q E E G S H L V S I Q S W A E S V Y V A S L V S - R R V F L I N V W I G L S D W W K - - - -                                   | Q H T W Y W S D G S K F R Y K S - -                                                                                                                                                                                         | W K L G E P N N F L W N E Y C V E L C S F S - -                                                                                               | G Y L R W N D Q Y C M S W R Y F V C K F Q - - - -                                                                                             |                                                         |           |           |           |           |           |           |           |                                                                                                                                               |                                                                                                                                               |                                                                                                                                               |                                                                                                                                               |           |           |     |
| M. surinamensis    | DN73172_c0_g1_i1 m.32915     | 6         | - - - - F L S F G L L - - -                                                                                                                                                                                               | V V A L C L R G T G A D P - Q C P F D W S S Y N G H C Y K V F K D L K S W H D A E M T C R Q Q E E G S H L V S I Q S W A E S V Y V A S L V S - R R V F L I N V W I G L S D W W K - - - -                                   | Q H T W Y W S D G S K F R Y K S - -                                                                                                                                                                                         | W K L G E P N N F L W N E Y C V E L C S F S - -                                                                                               | G Y L R W N D Q Y C M S W R Y F V C K F Q - - - -                                                                                             |                                                         |           |           |           |           |           |           |           |                                                                                                                                               |                                                                                                                                               |                                                                                                                                               |                                                                                                                                               |           |           |     |
| M. spixii          | DN96236_c0_g1_i1 m.48474     | 6         | - - - - F L S F G L L - - -                                                                                                                                                                                               | V V A L C L R G T G A D P - Q C P F D W S S Y N G H C Y K V F K D L K S W H D A E I T C R Q Q E E G S H L A S I Q S L A E S A Y V A N L V S - H S V F L T N V W I G L S D P W K - - - -                                   | Q Y T W Y W S D G S R F R Y Q S - -                                                                                                                                                                                         | W K L G E P N N F L W N E Y C V E L C S F S - -                                                                                               | G Y L R W N D Q Y C M S W R Y F V C K F Q - - - -                                                                                             |                                                         |           |           |           |           |           |           |           |                                                                                                                                               |                                                                                                                                               |                                                                                                                                               |                                                                                                                                               |           |           |     |
| M. spixii          | DN96236_c0_g1_i2 m.48475     | 6         | - - - - F L S F G L L - - -                                                                                                                                                                                               | V V A L C L R G T G A D P - Q C P F D W S S Y N G H C Y K V F K D L K S W H D A E I T C R Q Q E E G S H L A S I Q S L A E S A Y V A N L V S - H S V F L T N V W I G L S D P - K - - - -                                   | Q Y T W Y W S D G S R F R Y Q S - -                                                                                                                                                                                         | W K L G E P N N F L W N E Y C V E L C S F S - -                                                                                               | G Y L R W N D Q Y C M S W R Y F V C K F Q - - - -                                                                                             |                                                         |           |           |           |           |           |           |           |                                                                                                                                               |                                                                                                                                               |                                                                                                                                               |                                                                                                                                               |           |           |     |
| M. tener           | CTL 3 JAS05174.1             | 6         | M G R F L F V S L C L L - - -                                                                                                                                                                                             | V V A F S L N G I G A D R - Y C P F D W F S H N A S C Y K L F K H P M T W D R A Q R F C T E K Q E N S Q L A S I H D A E V S V K L S N H I S Q R L K F L - D V W I G L R L S K R - - - -                                   | T S I W E W S D G S N L N H T S - -                                                                                                                                                                                         | W E K G E P N N L F K G E F C A A L S A G S - -                                                                                               | R Y L Q W N D K G C W H L H P F V C K F Q L R S E A D A - - - -                                                                               |                                                         |           |           |           |           |           |           |           |                                                                                                                                               |                                                                                                                                               |                                                                                                                                               |                                                                                                                                               |           |           |     |
| M. corallinus      | DN81789_c1_g1_i1 m.29377     | 6         | M G R F L F V S L C L L - - -                                                                                                                                                                                             | V V A F S L N G I G A H R - Y C P F D W F S H N A S C Y K L F K H P M T W D R A Q R F C T E K Q E N G Q L A S I H D A E V S V K L S N H I S Q R L K I L - D V W I G L R L S K R - - - -                                   | K S I W E W S D G S N L T Y T S - -                                                                                                                                                                                         | W E K G E P N N L M N G E F C A V L S T G S - -                                                                                               | R Y L Q W N D K S C W H V H S F V C K F Q - - - -                                                                                             |                                                         |           |           |           |           |           |           |           |                                                                                                                                               |                                                                                                                                               |                                                                                                                                               |                                                                                                                                               |           |           |     |
| M. spixii          | DN94479_c2_g1_i1 m.34852     | 6         | M G R F P F V S L C L L - - -                                                                                                                                                                                             | V V A F S L N G I G A D H - H C P S D W F S F D K F C Y K F I R Q W K S W N D A E T F C T Q L Q N S S H L V S I H S Q A E T F R V Q K V I F M N M V L L D D V W I G L S D P W N - - - -                                   | N R T W I W T D G S E L D Y T S - -                                                                                                                                                                                         | W V S E E P S N V D E W D S C V L L S S S S - -                                                                                               | R Y R K W K A A P C E S N N Y F I C K M * - - - -                                                                                             |                                                         |           |           |           |           |           |           |           |                                                                                                                                               |                                                                                                                                               |                                                                                                                                               |                                                                                                                                               |           |           |     |
| M. corallinus      | CTL ACS74989.1               | 6         | M G Q F L L V S L G L L - - -                                                                                                                                                                                             | L V A F S L N G I G A D H - H C P S D W Y S F D K F C Y K F I K Q W K S W N D A E A S C A R L Q D S S H L A S I H S Q A E I F R V Q K V I F M N T V L Y D D V W I G L S D P W E - - - -                                   | N R T W V W S D G S A Y D Y T S - -                                                                                                                                                                                         | W V S E K P S A V D E E Q H C V H L S S S S - -                                                                                               | R Y R E W E A A S C E S N N Y F I C K M - - - -                                                                                               |                                                         |           |           |           |           |           |           |           |                                                                                                                                               |                                                                                                                                               |                                                                                                                                               |                                                                                                                                               |           |           |     |
| M. tener           | CTL 4 JAS05173.1             | 6         | M G Q F L L V S L G L L - - -                                                                                                                                                                                             | L V A F S L N G I G A D H - H C P S D W Y S F D K F C Y K F I K Q W K S W N D A E A S C T R L Q N S S H L A S I H S Q A E I F R V Q K V I F M N T V L Y D D V W I G L S D P W E - - - -                                   | N G T W V W S D G S A Y D Y T S - -                                                                                                                                                                                         | W V S E K P S A V D E E Q H C V Q L S S S S - -                                                                                               | R Y R E W E A A T C E S N N Y F I C K M - - - -                                                                                               |                                                         |           |           |           |           |           |           |           |                                                                                                                                               |                                                                                                                                               |                                                                                                                                               |                                                                                                                                               |           |           |     |
| M. fulvius         | CTL 1 JAS05062.1             | 6         | M G Q F L L V S L G L L - - -                                                                                                                                                                                             | L V A F S L N G I G A D H - H C P S D W Y S F D K F C Y K F I K Q W K S W N D A E A S C T R L Q N S S H L A S I H S Q A E I F R V Q K V I F M N T V L Y D D V W I G L S D P W E - - - -                                   | N G T W V W S D G S A Y D Y T S - -                                                                                                                                                                                         | W V S E K P S A V D E E Q H C V H L S S S S - -                                                                                               | R Y R E W E A A T C E S N N Y F I C K M - - - -                                                                                               |                                                         |           |           |           |           |           |           |           |                                                                                                                                               |                                                                                                                                               |                                                                                                                                               |                                                                                                                                               |           |           |     |
| M. spixii          | DN13392_c0_g1_i1 m.12278     | 7         | M G Q F I I V S F G L L - - -                                                                                                                                                                                             | V V V L S L R G T R A D H - H C P P S W A S Y N E F C Y M V S N G S M T W N N A E R F C L Q Q Q P D C H L A S I H S K P E A A F I V G L V Y - H A S S G S S V W I G M N D P E K - - - -                                   | R H A W Q W S D G S S L I Y K S - -                                                                                                                                                                                         | W M P G E P N N Y A S T E Y C V V L S A W S - -                                                                                               | R Y V G W N D Q D C G S R H N F V C K F Q - - - -                                                                                             |                                                         |           |           |           |           |           |           |           |                                                                                                                                               |                                                                                                                                               |                                                                                                                                               |                                                                                                                                               |           |           |     |
| M. tener           | CTL 5 JAS05172.1             | 7         | M G Q F I I V S F G L L - - -                                                                                                                                                                                             | V V A L S L R G T G A D H - H C P S S W A S Y N E F C Y M V S N I S M T W N N A E S F C R K Q Q P D C H L A S I H S K P E A A F I V G L A Y H G A S S R S S V W I G L N D P E K - - - -                                   | R R A W L W S D G S S L I Y K S - -                                                                                                                                                                                         | W M P G E P N N H A S M E Y C V V L S A W S - -                                                                                               | R Y V G W N D Q D C G S R H N F V C K F Q P R S - - - -                                                                                       |                                                         |           |           |           |           |           |           |           |                                                                                                                                               |                                                                                                                                               |                                                                                                                                               |                                                                                                                                               |           |           |     |
| M. corallinus      | CTL ACS74992.1               | 7         | M G Q F I I V S F G L V - - -                                                                                                                                                                                             | V V A L S L R G T G A D H - H C P S S W A S Y N E F C Y M V S N G S M T W N N A E G F C L K Q Q P D C H L A S I H S K P E A A F I V G L A Y H G A S S R S S V W I G L N D P E K - - - -                                   | R R A W Q W S D G S R L I Y K S - -                                                                                                                                                                                         | W M P G E P N N H A S M E Y C V V L S A W S - -                                                                                               | R Y V G W N D Q D C G S R H N F V C K F Q P R S - - - -                                                                                       |                                                         |           |           |           |           |           |           |           |                                                                                                                                               |                                                                                                                                               |                                                                                                                                               |                                                                                                                                               |           |           |     |
| M. corallinus      | GQ139598.1                   | (7-8)     | - - - - -                                                                                                                                                                                                                 | - - - - -                                                                                                                                                                                                                 | - - - - -                                                                                                                                                                                                                   | - - - - -                                                                                                                                     | - - - - -                                                                                                                                     | - - - - -                                               | - - - - - | - - - - - | - - - - - | - - - - - | - - - - - | - - - - - | - - - - - | R R A W Q W S D G S R L I Y K S - -                                                                                                           | W M P G E P N N H A S M E Y C V V L S A W S - -                                                                                               | R Y V G W N D Q D C G S R H N F V C K F Q - - - -                                                                                             | - - - - -                                                                                                                                     | - - - - - | - - - - - |     |
| M. surinamensis    | DN74850_c0_g3_i1 m.4588      | 8         | M G R F L F V S P C L L - - -                                                                                                                                                                                             | F V V F S L N E I G A N C - H C P F N W L S H N A S C Y K L F N S L K T W D Q A E R F C M E K Q E N C Q L A S I N D A G L S V K L S N Y I S Q R L K F R - D V W I G L R F S K R - - - -                                   | K S T W E W S D G S N L T Y T S - -                                                                                                                                                                                         | W E K G E P N N F L N M E F C A V L S P S S - -                                                                                               | R Y L Q W N D K S C N H L H S F V C K F Q P Q S E E A R * - - - -                                                                             |                                                         |           |           |           |           |           |           |           |                                                                                                                                               |                                                                                                                                               |                                                                                                                                               |                                                                                                                                               |           |           |     |
| M. l. carvalhoi    | DN77062_c0_g1_i1 m.2647      | 8         | M G R F L F V S P C L L - - -                                                                                                                                                                                             | F V V F S L N E I G A N C - H C P F N W F P H N A S C Y K L F T S W K T W D Q A Q R F C M E K Q E N C Q L A S I N D V G E S V E L S K Y I S Q R W K I G - D I W I G L R L S K R - - - -                                   | K S I W E W S D G S N L T Y T S - -                                                                                                                                                                                         | W E K G E P N N F L N M E F C A V L S P R S - -                                                                                               | Y L Q W N D K N C E H L H S F L C K F Q - - - -                                                                                               |                                                         |           |           |           |           |           |           |           |                                                                                                                                               |                                                                                                                                               |                                                                                                                                               |                                                                                                                                               |           |           |     |
| M. surinamensis    | DN74850_c0_g3_i2 m.4589      | 8         | M G R F L F V S P C L L - - -                                                                                                                                                                                             | F V V F S L N E I G A N C - H C P F N W F P H N A F C Y K L F T S W K T W D Q A Q R F C M E K Q E N C Q L A S I N D V G E S V E L S K Y I S Q R W K I G - D I W I G L R L S K R - - - -                                   | K S N W E W N D G S N L T Y T S - -                                                                                                                                                                                         | W E K G E P N N F L N M E F C A V L S P R S - -                                                                                               | Y L Q W N D K N C E H L H S F L C K F Q - - - -                                                                                               |                                                         |           |           |           |           |           |           |           |                                                                                                                                               |                                                                                                                                               |                                                                                                                                               |                                                                                                                                               |           |           |     |
| M. paraensis       | DN76964_c0_g1_i1 m.31474     | (9)       | - - - - -                                                                                                                                                                                                                 | - - - - -                                                                                                                                                                                                                 | - - - - -                                                                                                                                                                                                                   | - - - - -                                                                                                                                     | - - - - -                                                                                                                                     | - - - - -                                               | - - - - - | - - - - - | - - - - - | - - - - - | - - - - - | - - - - - | - - - - - | N R T W A W T D R S S T N Y T S - -                                                                                                           | W N E G E P N N S W N K E Y C V - - - -                                                                                                       | - - - - -                                                                                                                                     | - - - - -                                                                                                                                     | - - - - - | - - - - - |     |
| M. spixii          | DN19016_c0_g1_i1 m.61467     | 9         | M G H F T F I S L C L V - - -                                                                                                                                                                                             | - - - - -                                                                                                                                                                                                                 | P M F L S L S G A E C Y N C P I D W L S R N G F C Y K L F D D P K A W P D A E M F C R K H K P G C H L V S I H S A A E S A D L A E Y I S D Y L K S N K N V W I G L N D P E K - - - -                                         | N R T W E W T D R S S T N Y S S - -                                                                                                           | W N E G E P N N S R N E E Y C V H L L T L K - -                                                                                               | G Y H K W N D T P C K S L F S F I C K C K F * - - - -   |           |           |           |           |           |           |           |                                                                                                                                               |                                                                                                                                               |                                                                                                                                               |                                                                                                                                               |           |           |     |
| M. l. lemniscatus  | DN117978_c2_g1_i1 m.33959    | 9         | M D H F T F I S L C L M - - -                                                                                                                                                                                             | - - - - -                                                                                                                                                                                                                 | P M F L S L S G V E C Y T C P I D W L S R N G F C Y K L F D D P K A W P D A E M F C R K H K P G C H L V S I H S A A E S A D L A E Y I S D Y L K S N K N V W I G L M N D P E K - - - -                                       | N R T W A W T D R S S T N Y T S - -                                                                                                           | W N E G E P N N S W N K E Y C V H L L T L K - -                                                                                               | G Y H K W N D T P C E S L F S F I C K C R F * - - - -   |           |           |           |           |           |           |           |                                                                                                                                               |                                                                                                                                               |                                                                                                                                               |                                                                                                                                               |           |           |     |
| M. l. carvalhoi    | DN1151_c0_g1_i1 m.24490      | 9         | M D H F T F I S L C L M - - -                                                                                                                                                                                             | - - - - -                                                                                                                                                                                                                 | P M F L S L S G A E C Y T C P I D W L S R N G F C Y K L F D D P K A W P D A E M F C R K H K P G C H L V S I H S A A E S A D L A E Y V S D Y L K S D K N V W I G L N D P E K - - - -                                         | N R T W E W T D R S S T N Y T S - -                                                                                                           | W N E G E P N N S W N K E Y C V H L L T L K - -                                                                                               | G Y H K W N D T P C E S L F S F I C K C K F * - - - -   |           |           |           |           |           |           |           |                                                                                                                                               |                                                                                                                                               |                                                                                                                                               |                                                                                                                                               |           |           |     |
| M. corallinus      | CTL ACS74993.1               | 9         | M G H F T F I S L C L M - - -                                                                                                                                                                                             | - - - - -                                                                                                                                                                                                                 | P I F L S L S G A E C Y T C P I D W L S R N G L C Y K L F D D T K T W P D A E I F C R K H K P G C H L T S I H S E A E S A D L A E Y I Y D Y L K S E K N V W I G L N D P Q K - - - -                                         | E R I W E W T D R S S T N Y T S - -                                                                                                           | W N E G E P N N S W N K E Y C V H L L A S Q - -                                                                                               | G Y L K W N D T P C E S L F A F I C R C Q F - - - -     |           |           |           |           |           |           |           |                                                                                                                                               |                                                                                                                                               |                                                                                                                                               |                                                                                                                                               |           |           |     |
| M. paraensis       | DN17199_c0_g1_i1 m.16007     | 9         | M G H F T F I S L C L M - - -                                                                                                                                                                                             | - - - - -                                                                                                                                                                                                                 | P I F L S L S G A E C Y T C P I D W L S R N G L C Y K L F D D T K T W P D A E I F C R K H K P G C H L T S I H S E A E S A D L A E Y I Y D Y L K S E K N V W I G L N D P Q K - - - -                                         | E R I W E W T D R S S T N Y T S - -                                                                                                           | W N E G E P N N S W N K E Y C V H L L A S Q - -                                                                                               | G Y L K W N D T P C E S L F A F I C R C Q F * - - - -   |           |           |           |           |           |           |           |                                                                                                                                               |                                                                                                                                               |                                                                                                                                               |                                                                                                                                               |           |           |     |
| M. fulvius         | CTL 1a JAB52843.1            | 9         | M G H F T F I S L C L M - - -                                                                                                                                                                                             | - - - - -                                                                                                                                                                                                                 | P M F L S L N E A E C Y T C P I D W L S R N G L C Y K L F D D T K T W P D A E M F C R K H K P G C H L A S I H S T A E S A D L A E Y I Y D Y L K S E K N V W I G L N D P R K - - - -                                         | E R I W E W T D R S S T N Y T S - -                                                                                                           | W N E G E P N N S W N K E Y C V H L L A S E - -                                                                                               | G Y L K W N D T P C E S L F A F I C R C Q F - - - -     |           |           |           |           |           |           |           |                                                                                                                                               |                                                                                                                                               |                                                                                                                                               |                                                                                                                                               |           |           |     |
| M. tener           | CTL 6a JAS05171.1            | 9         | M G H F T F I S L C L M - - -                                                                                                                                                                                             | - - - - -                                                                                                                                                                                                                 | P I F L S L S G A E C Y T C P I D W L S R N G L C Y K L F D D T K A W P D A E M F C R K H K P G C H L A S I H S T A E S A D L A E Y I Y D Y L K S E K N V W I G L N D P R K - - - -                                         | E R I W E W T D R S S T N Y T S - -                                                                                                           | W N E G E P N N S W N K E Y C V H L L A S E - -                                                                                               | G Y L K W N D T P C E S L F A F I C R C Q F - - - -     |           |           |           |           |           |           |           |                                                                                                                                               |                                                                                                                                               |                                                                                                                                               |                                                                                                                                               |           |           |     |
| M. surinamensis    | DN76622_c1_g1_i1 m.25232     | 9         | M D H F T F I N F C L M - - -                                                                                                                                                                                             | - - - - -                                                                                                                                                                                                                 | P M F L S L S G V E C Y T C P I D W L S R N G F C Y K L F D D P K A W P D A E M F C R K H K P G C H L V S I H S A A E S A D L A E Y V S D Y L K S D T N V W I G L N D P Q K A G P F L L K R I W E W T D R S S T N Y S S - - | W N E G E P N N S W N K E Y C V H L L T V K - -                                                                                               | G Y H K W N D T P C E S L F S F I C K C E F * - - - -                                                                                         |                                                         |           |           |           |           |           |           |           |                                                                                                                                               |                                                                                                                                               |                                                                                                                                               |                                                                                                                                               |           |           |     |
| M. fulvius         | GAEP01001978.1               | (8)       | M G H F T F I S L C L M - - -                                                                                                                                                                                             | - - - - -                                                                                                                                                                                                                 | P M F L S L N E A E - - T C P I D W L S R N G L C Y K L F D D T K T W P D A E M F C R K H K P G C H L A S I H S T A E S A D L A E Y I Y D Y - K S E K N V W I G L N D P R K - - - -                                         | E R I W E W T D - - S T N Y T S - -                                                                                                           | W N E G E P N N S W N K E Y C V H L L A S E - -                                                                                               | G Y L K W N D T P C E S L F A F I C R - - - -           |           |           |           |           |           |           |           |                                                                                                                                               |                                                                                                                                               |                                                                                                                                               |                                                                                                                                               |           |           |     |
| M. surinamensis    | DN76622_c1_g1_i2 m.25235     | (8)       | M D H F T F I N F C L M - - -                                                                                                                                                                                             | - - - - -                                                                                                                                                                                                                 | P M F L S L S G A E - - N C P I D W L S R N G F C Y K L F D D P K A W P D A E M F C R K H K P G C H L V S I H S A A E S A D L A E Y V S D Y - K S D T N V W I G L N D P Q K - - - -                                         | E R I W E W T D R S S T N Y S S - -                                                                                                           | W N E G E P N N S W N K E Y C V H L L A S Q - -                                                                                               | G Y L K W N D T P C E S L F A F I C R - - - -           |           |           |           |           |           |           |           |                                                                                                                                               |                                                                                                                                               |                                                                                                                                               |                                                                                                                                               |           |           |     |
| M. spixii          | DN19016_c0_g2_i1 m.61468     | (8)       | M G H F T F I S L C L V - - -                                                                                                                                                                                             | - - - - -                                                                                                                                                                                                                 | P M F L S L S G A E - - N C P I D W L S R N G F C Y K L F D D P K A W P D A E M F C R K H K P G C H L V S I H S A A E S A D L A E Y V S D Y - K S K K N V W I G L N D P E K - - - -                                         | N R T W E W T D R S S T N Y S S - -                                                                                                           | W N E G E P N N S R N E E Y C V H L L T L K - -                                                                                               | G Y H K W N D T P C K S L F S F I C K - - - -           |           |           |           |           |           |           |           |                                                                                                                                               |                                                                                                                                               |                                                                                                                                               |                                                                                                                                               |           |           |     |
| M. corallinus      | DN85871_c3_g1_i1 m.62160     | (8)       | M G H F T F I S L C L M - - -                                                                                                                                                                                             | - - - - -                                                                                                                                                                                                                 | P I F L S L S G A E - - - C P I D W L S R N G L C Y K L F D D T K T W P D A E I F C R K H K P G C H L T S I H S E A E S A D L A E Y I Y D Y - K S E K N V W I G L N D P Q K - - - -                                         | E R I W E W T D - - S T N Y T S - -                                                                                                           | W N E G E P N N S W N K E Y C V H L L A S Q - -                                                                                               | G Y L K W N D T P C E S L F A F I C R - - - -           |           |           |           |           |           |           |           |                                                                                                                                               |                                                                                                                                               |                                                                                                                                               |                                                                                                                                               |           |           |     |
| M. paraensis       | DN3061_c2_g1_i1 m.10450      | (8-9)     | - - - - -                                                                                                                                                                                                                 | - - - - -                                                                                                                                                                                                                 | - - - - -                                                                                                                                                                                                                   | - - - - -                                                                                                                                     | - - - - -                                                                                                                                     | - - - - -                                               | - - - - - | - - - - - | - - - - - | - - - - - | - - - - - | - - - - - | - - - - - | Q R N W Q W T D R S R N S Y L T - -                                                                                                           | W K P G E P N N L R N N E N C V E L W S A S - -                                                                                               | G Y K N W N D E N C A S T R A Y L C K C R F * - - - -                                                                                         |                                                                                                                                               |           |           |     |
| M. corallinus      | DN79899_c0_g1_i1 m.30755     | (8-9)     | - - - - -                                                                                                                                                                                                                 | - - - - -                                                                                                                                                                                                                 | - - - - -                                                                                                                                                                                                                   | - - - - -                                                                                                                                     | - - - - -                                                                                                                                     | - - - - -                                               | - - - - - | - - - - - | - - - - - | - - - - - | - - - - - | - - - - - | - - - - - | Q R N W Q W T D R S R N S Y L T - -                                                                                                           | W K P G E P N N L R N N E N C V E L W S A S - -                                                                                               | G Y K N W N D E N C A S T R A Y L C K C R - - - -                                                                                             |                                                                                                                                               |           |           |     |
| M. surinamensis    | DN13766_c0_g2_i1 m.1965      | (8-9)     | - - - - -                                                                                                                                                                                                                 | - - - - -                                                                                                                                                                                                                 | - - - - -                                                                                                                                                                                                                   | - - - - -                                                                                                                                     | - - - - -                                                                                                                                     | - - - - -                                               | - - - - - | - - - - - | - - - - - | - - - - - | - - - - - | - - - - - | - - - - - | Q R N W Q W T D R S R N T Y L T - -                                                                                                           | W K P G E P N N L R N N E N C V E L W S A S - -                                                                                               | G Y K N W N D E N C A S T R A Y L C K C R - - - -                                                                                             |                                                                                                                                               |           |           |     |
| Bungarus fasciatus | C-type lectin Bfl-2 Q90W17.1 | 9         | M G H F T F I G L C L L A - - -                                                                                                                                                                                           | - - - - -                                                                                                                                                                                                                 | M F L S L S G A E C Y T C P I D W L P K N G L C Y K V F S N P K S W L D A E M F C R K F K P G C H L A S I H R D A D S A D L A E Y V S D Y L K D D G N V W I G L N D P Q K - - - -                                           | K R T W V W S D R S S S N Y F S - -                                                                                                           | W N Q G E P N N S K N K E Y C V H L W A - -                                                                                                   | P T G Y L K W N D A P C E T L H P F I C Q C K Y - - - - |           |           |           |           |           |           |           |                                                                                                                                               |                                                                                                                                               |                                                                                                                                               |                                                                                                                                               |           |           |     |
