# Supplementary material for: Coralsnake Venomics: Analyses of Venom Gland Transcriptomes and Proteomes of Six Brazilian Taxa
Source: MDPI journal article supplement (doi:10.3390/toxins9060187), 2017-06-08
Supplement: s1 [file s1]

| Species         | Transcript ID            | -10                                                                                                                                                                                                                                                                                                                                                                                                                         | 1                 | 10                       | 20                                                                                                                                                                                                                                                                                                                                                                                                                          | 30              | 40                       | 50                                                                                                                                                                                                                                                                                                                                                                                                                          | 60            | 70                       | 80                                                                                                                                                                                                                                                                                                                                                                                                                                                                                                    | 90        | 100                       | 110                                                                                                                                                                                                                                                                                                                                                                                                                                                                                                   | 120          | 130                     | 140                                                                                                                                                                                                                                                                                                                                                                                                                                                                                                 | 150                | 160              | 170                                                                                                                                                                                                                                                                                                                                                                                                                                                                                                   | 180 | 190 | 200 | 210 | 220 |
|-----------------|--------------------------|-----------------------------------------------------------------------------------------------------------------------------------------------------------------------------------------------------------------------------------------------------------------------------------------------------------------------------------------------------------------------------------------------------------------------------|-------------------|--------------------------|-----------------------------------------------------------------------------------------------------------------------------------------------------------------------------------------------------------------------------------------------------------------------------------------------------------------------------------------------------------------------------------------------------------------------------|-----------------|--------------------------|-----------------------------------------------------------------------------------------------------------------------------------------------------------------------------------------------------------------------------------------------------------------------------------------------------------------------------------------------------------------------------------------------------------------------------|---------------|--------------------------|-------------------------------------------------------------------------------------------------------------------------------------------------------------------------------------------------------------------------------------------------------------------------------------------------------------------------------------------------------------------------------------------------------------------------------------------------------------------------------------------------------|-----------|---------------------------|-------------------------------------------------------------------------------------------------------------------------------------------------------------------------------------------------------------------------------------------------------------------------------------------------------------------------------------------------------------------------------------------------------------------------------------------------------------------------------------------------------|--------------|-------------------------|-----------------------------------------------------------------------------------------------------------------------------------------------------------------------------------------------------------------------------------------------------------------------------------------------------------------------------------------------------------------------------------------------------------------------------------------------------------------------------------------------------|--------------------|------------------|-------------------------------------------------------------------------------------------------------------------------------------------------------------------------------------------------------------------------------------------------------------------------------------------------------------------------------------------------------------------------------------------------------------------------------------------------------------------------------------------------------|-----|-----|-----|-----|-----|
| M. l. carvalhoi | DN75413_c0_g1_i1 m.15896 | M I A F I L L L S L A A V L Q Q S S G T V D F A S E S S N K R E N Q K Q I V D K H N A L R R S V K P T A R N M L Q M E W N S N A A Q N A K R W A D R C R F A H S P P Q L R T V G K L G C G E N L F M S S Q P Y A W S R V I Q F W Y D E Y K N F V Y G V G A N P P N S V I G H Y T Q I V W D R S H L L G C A A A R C S S S K - - Y I Y V C Q Y C P A G N I I G S I A T P Y K S G P P C G D C P R A C N N G L C T N P - - - - - | M. l. lemniscatus | DN88751_c0_g1_i1 m.69060 | M I A F I L L L S L A A V L Q Q S S G T V D F A S E S S N K R E N Q K Q I V D K H N A L R R S V K P T A R N M L Q M E W N S N A A Q N A K R W A D R C R F A H S P P Q L R T V G K L G C G E N L F M S S Q P Y A W S R V I Q F W Y D E Y K N F V Y G V G A N P P N S V I G H Y T Q I V W D R S H L L G C A A A R C S S S K - - Y I Y V C Q Y C P A G N I I G S I A T P Y K S G P P C G D C P R A C N N G L C T N P - - - - - | M. surinamensis | DN73044_c1_g1_i1 m.39309 | M I A F I L L L S L A A V L Q Q S S G T V D F A S E S S N K R E N Q K Q I V D K H N A L R R S V K P T A R N M L Q M E W N S N A A Q N A K R W A D R C R F A H S P P Q L R T V G K L G C G E N L F M S S Q P Y A W S R V I Q F W Y D E Y K N F V Y G V G A N P P N S V I G H Y T Q I V W D R S H L L G C A A A R C S S S K - - Y I Y V C Q Y C P A G N I I G S I A T P Y K S G P P C G D C P R A C N N G L C T N P - - - - - | M. corallinus | DN98152_c0_g1_i1 m.37642 | M I A F I V L L S L A A V L Q Q S S G T V D F A F E S S N K R E N Q K Q I V D K H N A L R R S V K P T A R N M L Q M E W N S N A A Q N A Q S W A D R C S F A H S P P H L R T V G N F G C G E N L F M S S Q P Y A W S S V I Q S W Y D E H K N F V Y G V G A K T P G S V T G H Y T Q V V W Y R S N L L G C A A T R C S S S K - - Y I F V C H Y C P A G N I L N S I A T P Y K S G P P C G D C P R A C N N G L C T N P C K Y K D D A S N C Q S L A K Q Y K C Q T E W V K S K C P A S C F C H T E I I - - - | M. spixii | DN100685_c0_g1_i1 m.22959 | M I A F I V L L S L A A V L Q Q S S G T V D F A S E S S N K R E N Q K Q I V D K H N A L R R S V K P T A R N M L Q M E W N S N A A Q N A K R W A D R C S F A H S P S H L R T V G K F D C G E N L L M S S Q P Y A W S R V I Q L W Y D E S K N F V Y G V G A K P P N S V I G H Y T Q I V W Y R S H L L G C A A A R C S S S - - H Y L Y V C Q Y C P A G N V I G S I A T P Y K S G P P C G D C P R A C N N G L C T N P C K Y K D E L S N C Q S L A K T D K C Q T A W I K S K C P A S C L C R T E I I - - - | M. paraensis | DN86174_c1_g1_i6 m.9788 | M I I F I L L S L A A V L Q Q S F G N V D F N S E S T R R K Q K Q K E I V D L H N S F R R S V S P T A S N M L K M K W Y P E A A S N A E R W T N N C I L D H S P E T L R I L E G I Q C G E N I Y M S G N P R A W T E I I Q L W H D K Y K N F V Y G I G A N P P G S I T G H Y T Q I V W Y K S Y R I G C A V N Y C P S S E Y E Y F Y V C Q Y C P S G N F Q G S T A T P Y K L G P P C G D C P S A C D N G L C T N P C K Y A D F Y R N C K S I V N R Y G C Q N A L V R T Y C R A T C S C H N E I I - - - | Oophis okinawensis | CRISP BAN82147.1 | M I A F I V L P I L A A V L Q Q S S G S V D F D S E S P R K P E I Q N E I V D L H N S L R R S V N P T A S N M L K M E W Y P E A A A N A E R W A Y R C I E E H S P R D S R V I E G I K C G E N I Y M S T N P R K W I E I I H A W H D E Y K D F K Y G I G A D P S N A V I G H Y T Q I V W Y K S Y R A G C A A A Y C P S L E Y S Y F Y V C Q Y C P A G N I V G K T A T P Y K S G P P C G D C P S A C D N G L C T N P C T E E N K F I N C N S M V Q K S S C Q D N Y I K S I C P A S C F C Q N K I I - - - |     |     |     |     |     |
