# Supplementary material for: Coralsnake Venomics: Analyses of Venom Gland Transcriptomes and Proteomes of Six Brazilian Taxa
Source: MDPI journal article supplement (doi:10.3390/toxins9060187), 2017-06-08
Supplement: s1 [file s1]

| Species           | Transcript ID             | 1 | 10 | 20 | 30 | 40 | 50 | 60 | 70 | 80 | 90 | 100 | 110 | 120 | 130 | 140 | 150 | 160 | 170 | 180 | 190 | 200 | 210 | 220 | 230 | 240 | 250 |   |   |   |   |   |   |   |   |   |   |   |   |   |   |   |   |   |   |   |   |   |   |   |   |   |   |   |   |   |   |   |   |   |   |   |   |   |   |   |   |   |   |   |   |   |   |   |   |   |   |   |   |   |   |   |   |   |   |   |   |   |   |   |   |   |   |   |   |   |   |   |   |   |   |   |   |   |   |   |   |   |   |   |   |   |   |   |   |   |   |   |   |   |   |   |   |   |   |   |   |   |   |   |   |   |   |   |   |   |   |   |   |   |   |   |   |   |   |   |   |   |   |   |   |   |   |   |   |   |   |   |   |   |   |   |   |   |   |   |   |   |   |   |   |   |   |   |   |   |   |   |   |   |   |   |   |   |   |   |   |   |   |   |   |   |   |   |   |   |   |   |   |   |   |   |   |   |   |   |   |   |   |   |   |   |   |   |   |   |   |   |   |   |   |   |   |   |   |   |   |   |   |   |   |   |   |   |   |   |   |   |   |   |   |   |   |   |   |   |   |   |   |   |   |
|-------------------|---------------------------|---|----|----|----|----|----|----|----|----|----|-----|-----|-----|-----|-----|-----|-----|-----|-----|-----|-----|-----|-----|-----|-----|-----|---|---|---|---|---|---|---|---|---|---|---|---|---|---|---|---|---|---|---|---|---|---|---|---|---|---|---|---|---|---|---|---|---|---|---|---|---|---|---|---|---|---|---|---|---|---|---|---|---|---|---|---|---|---|---|---|---|---|---|---|---|---|---|---|---|---|---|---|---|---|---|---|---|---|---|---|---|---|---|---|---|---|---|---|---|---|---|---|---|---|---|---|---|---|---|---|---|---|---|---|---|---|---|---|---|---|---|---|---|---|---|---|---|---|---|---|---|---|---|---|---|---|---|---|---|---|---|---|---|---|---|---|---|---|---|---|---|---|---|---|---|---|---|---|---|---|---|---|---|---|---|---|---|---|---|---|---|---|---|---|---|---|---|---|---|---|---|---|---|---|---|---|---|---|---|---|---|---|---|---|---|---|---|---|---|---|---|---|---|---|---|---|---|---|---|---|---|---|---|---|---|---|---|---|---|---|---|---|---|---|---|---|---|---|---|---|---|---|---|---|---|---|---|---|
| M. fulvius        | PLB_JAB52759.1            | M | V  | R  | F  | G  | S  | A  | A  | S  | S  | D   | N   | R   | R   | Q   | R   | C   | W   | S   | -   | -   | W   | Y   | W   | R   | G   | L | L | L | L | W | A | V | A | E | T | R | A | D | L | H | Y | A | T | V | Y | W | L | E | A | E | K | S | F | Q | V | K | D | L | L | D | K | N | G | D | A | Y | G | Y | Y | N | D | S | V | Q | S | T | G | W | G | I | L | E | I | K | A | G | Y | G | N | Q | L | V | S | N | E | I | L | M | Y | A | A | G | F | L | E | G | Y | L | T | A | S | R | M | S | D | H | V | A | N | M | Y | H | Q | L | I | K | D | V | I | V | E | Q | K | V | K | D | F | M | Q | K | Q | D | E | W | T | R | Q | Q | I | K | N | N | K | D | D | P | F | W | R | N | A | G | Y | I | I | A | Q | L | D | G | L | Y | M | G | N | L | E | W | A | K | R | Q | K | R | T | P | L | T | E | F | E | I | S | F | L | N | A | I | G | D | L | L | D | L | I | P | A | L | S | S | K | S | R | N | D | D | S | P | S | M | S | G | A | S | N | M | Y | E | W | D | M | G | H | C | S | A | L | I | K | V | L | P | G | Y | E | N | I | Y | F |
| M. corallinus     | DN127573_c1_g1_i1 m.8709  | - | -  | -  | -  | -  | -  | A  | A  | S  | S  | D   | N   | R   | R   | Q   | R   | C   | W   | S   | -   | -   | W   | Y   | W   | R   | G   | L | L | L | L | W | A | V | A | E | T | R | A | D | L | H | Y | A | T | V | Y | W | L | E | A | E | K | S | F | Q | V | K | D | L | L | D | K | N | G | D | A | F | G | Y | Y | N | D | S | V | Q | S | T | G | W | G | I | L | E | I | K | A | G | Y | G | N | Q | L | V | S | N | E | I | L | M | Y | A | A | G | F | L | E | G | Y | L | T | A | S | R | M | S | D | H | V | A | N | M | Y | H | Q | L | I | K | D | V | I | I | E | Q | K | V | K | D | F | M | Q | K | Q | D | E | W | T | R | Q | Q | I | K | N | N | K | D | D | P | F | W | R | N | A | G | Y | I | I | A | Q | L | D | G | L | Y | M | G | N | L | E | W | A | K | R | Q | K | R | T | P | L | T | E | F | E | I | S | F | L | N | A | I | G | D | L | L | D | L | I | P | A | L | S | S | K | S | R | N | D | D | S | P | S | M | S | G | A | S | N | M | Y | E | W | D | M | G | H | C | S | A | L | I | K | V | L | P | G | Y | E | N | I | Y | F |
| M. paraensis      | DN16755_c1_g40_i2 m.29537 | M | V  | R  | F  | G  | S  | A  | A  | S  | S  | D   | N   | R   | R   | Q   | R   | C   | W   | S   | -   | -   | W   | Y   | W   | R   | G   | L | L | L | L | W | A | V | A | E | T | R | A | D | L | H | Y | A | T | V | Y | W | L | E | A | E | K | S | F | Q | V | K | D | L | L | D | K | N | G | D | A | Y | G | Y | Y | N | D | S | V | Q | S | T | G | W | G | I | L | E | I | K | A | G | Y | G | N | Q | L | V | S | N | E | I | L | M | Y | A | A | G | F | L | E | G | Y | L | T | A | S | R | M | S | D | H | V | A | N | M | Y | H | Q | L | I | K | D | V | I | I | E | Q | K | V | K | D | F | M | Q | K | Q | D | E | W | T | R | Q | Q | I | K | N | N | K | D | D | P | F | W | R | N | A | G | Y | I | I | A | Q | L | D | G | L | Y | M | G | N | L | E | W | A | K | R | Q | K | R | T | P | L | T | E | F | E | I | S | F | L | N | A | I | G | D | L | L | D | L | I | P | A | L | S | S | K | S | R | N | D | D | S | P | S | M | S | G | A | S | N | M | Y | E | W | D | M | G | H | C | S | A | L | I | K | V | L | P | G | Y | E | N | I | Y | F |
| M. spixii         | DN121163_c2_g1_i1 m.22331 | M | V  | R  | F  | G  | S  | A  | A  | S  | S  | D   | N   | R   | R   | Q   | R   | C   | W   | C   | W   | S   | W   | Y   | W   | G   | G   | L | L | L | L | W | A | V | A | E | T | R | A | D | L | H | Y | A | T | V | Y | W | L | E | A | E | K | S | F | Q | V | K | D | L | L | D | K | N | G | D | A | Y | G | Y | Y | N | D | T | V | Q | S | T | G | W | G | I | L | E | I | K | A | G | Y | G | N | Q | L | V | S | N | E | I | L | M | Y | A | A | G | F | L | E | G | Y | L | T | A | S | H | M | S | D | H | V | A | N | M | Y | H | Q | L | I | K | N | V | I | I | E | Q | K | V | K | D | F | M | Q | K | Q | D | E | W | T | R | Q | Q | I | K | N | N | K | D | D | P | F | W | R | N | A | G | Y | I | I | A | Q | L | D | G | L | Y | M | G | N | L | E | W | A | K | R | Q | K | R | T | P | L | T | E | F | E | I | S | V | L | N | A | I | G | D | L | L | D | L | I | P | A | L | S | S | E | S | R | N | N | D | S | P | S | M | S | G | A | S | K | M | Y | E | W | D | M | G | H | C | S | A | L | I | K | V | L | P | G | Y | E | N | I | Y | F |
| M. surinamensis   | DN59935_c0_g1_i2 m.17514  | M | V  | R  | F  | G  | S  | A  | A  | S  | S  | D   | N   | R   | R   | Q   | R   | C   | W   | C   | W   | S   | W   | Y   | W   | G   | G   | L | L | L | L | W | A | V | A | E | T | R | A | D | L | H | Y | A | T | V | Y | W | L | E | A | E | K | S | F | Q | V | K | D | L | L | D | K | N | G | D | A | Y | G | Y | Y | N | D | T | V | Q | S | T | G | W | G | I | L | E | I | K | A | G | Y | G | N | Q | L | V | S | N | E | I | L | M | Y | A | A | G | F | L | E | G | Y | L | T | A | S | R | M | S | D | H | V | A | N | M | Y | H | Q | L | I | K | N | V | T | I | E | Q | K | V | K | D | F | M | Q | K | Q | D | E | W | T | R | Q | Q | I | K | N | N | K | D | D | P | F | W | R | N | A | G | Y | I | I | A | Q | L | D | G | L | Y | M | G | N | L | E | W | A | K | R | Q | K | R | T | P | L | T | E | F | E | I | S | V | L | N | A | I | G | D | L | L | D | L | I | P | A | L | S | S | K | S | R | N | N | D | S | P | S | T | S | G | A | S | K | M | Y | E | W | D | M | G | H | C | S | A | L | I | K | V | L | P | G | Y | E | N | I | Y | F |
| M. l. carvalhoi   | DN69992_c0_g1_i1 m.19449  | M | V  | R  | F  | G  | S  | A  | A  | S  | S  | D   | N   | R   | R   | Q   | R   | C   | W   | C   | -   | -   | W   | Y   | W   | R   | G   | L | L | L | L | W | A | V | A | E | T | Q | A | D | L | H | Y | A | T | V | Y | W | L | E | A | E | K | S | F | Q | V | K | D | L | F | D | K | N | G | D | A | Y | G | Y | Y | N | D | T | V | Q | S | T | G | W | G | I | L | E | I | K | A | G | Y | G | N | Q | L | V | S | N | E | I | L | M | Y | A | A | G | F | L | E | G | Y | L | T | A | S | R | M | S | D | H | V | A | N | M | Y | H | Q | L | I | K | N | V | I | I | E | Q | K | V | K | D | F | M | Q | K | Q | D | E | W | T | R | Q | Q | I | K | N | N | K | D | D | P | F | W | R | N | A | G | Y | I | I | A | Q | L | D | G | L | Y | M | G | N | L | E | W | A | K | L | Q | K | R | T | P | L | T | E | F | E | I | S | V | L | N | A | I | G | D | L | L | D | L | I | P | A | L | S | S | E | S | S | N | N | D | S | P | S | M | S | G | A | S | K | M | Y | E | W | D | M | G | H | C | S | A | L | I | K | V | L | P | G | Y | E | N | I | Y | F |
| M. l. lemniscatus | DN105920_c5_g1_i1 m.16857 | M | V  | R  | F  | G  | S  | A  | A  | S  | S  | D   | N   | R   | R   | Q   | R   | C   | W   | C   | -   | -   | -   | W   | R   | G   | L   | L | L | L | W | A | V | A | E | T | R | A | D | L | H | Y | A | T | V | Y | W | L | E | A | E | K | S | F | Q | V | K | D | L | L | D | K | N | G | D | A | Y | G | Y | Y | N | D | T | V | Q | S | T | G | W | G | I | L | E | I | K | A | G | Y | G | N | Q | L | V | S | N | E | I | L | M | Y | A | A | G | F | L | E | G | Y | L | T | A | S | R | M | S | D | H | V | A | N | M | Y | H | Q | L | I | K | N | V | I | I | E | Q | K | V | K | D | F | M | Q | K | Q | D | E | W | T | R | Q | Q | I | K | N | N | K | D | D | P | F | W | R | N | A | G | Y | I | I | A | Q | L | D | G | L | Y | M | G | N | L | E | W | A | K | R | Q | K | R | T | P | L | T | E | F | E | I | S | V | L | N | A | I | G | D | L | L | D | L | I | P | A | L | S | S | K | S | N | N | D | S | P | S | M | S | G | A | S | K | M | Y | E | W | D | M | G | H | C | S | A | L | I | K | V | L | P | G | Y | E | N | I | Y | F |   |   |
| M. fulvius        | PLB_JAB52759.1            | G | H  | S  | S  | W  | F  | T  | Y  | A  | A  | T   | L   | R   | I   | Y   | K   | H   | W   | D   | F   | R   | I   | I   | D   | P   | Q   | T | K | T | G | R | A | S | F | S | S | Y | P | G | L | L | V | S | L | D | D | F | Y | I | L | G | S | G | L | I | M | L | Q | T | T | N | T | V | F | N | L | S | L | L | K | Q | V | V | P | E | S | L | F | A | W | E | R | V | R | I | A | N | M | M | A | D | S | G | K | T | W | A | Q | T | F | E | K | Q | N | S | G | T | Y | N | N | Q | Y | M | I | L | D | T | K | K | I | I | L | R | K | S | I | E | D | G | A | L | Y | I | I | E | Q | V | P | N | L | V | E | Y | S | D | Q | T | T | I | L | R | K | G | Y | W | P | S | Y | N | I | P | F | H | K | V | I | Y | N | M | S | G | Y | K | K | F | G | L | D | F | S | Y | E | M | A | P | R | A | K | I | F | R | R | D | Q | G | K | V | T | D | M | K | S | M | K | Y | I | M | R | Y | N | N | Y | K | K | D | P | Y | T | K | H | N | P | C | N | T | I | C | C | R | Q | D | L | N | Y | K | A | P | V | P | D | G | C | Y | D | S | K | V | S | D | I |
| M. corallinus     | DN127573_c1_g1_i1 m.8709  | G | H  | S  | S  | W  | F  | T  | Y  | A  | A  | T   | L   | R   | I   | Y   | K   | H   | W   | D   | F   | R   | I   | I   | D   | P   | Q   | T | K | T | G | R | A | S | F | S | S | Y | P | G | L | L | V | S | L | D | D | F | Y | I | L | G | S | G | L | I | M | L | Q | T | T | N | T | V | F | N | L | S | L | L | K | Q | V | V | P | E | S | L | F | A | W | E | R | V | R | I | A | N | M | M | A | D | S | G | K | T | W | A | Q | T | F | E | K | Q | N | S | G | T | Y | N | N | Q | Y | M | I | L | D | T | K | K | I | I | L | R | K | S | I | E | D | G | A | L | Y | I | I | E | Q | V | P | N | L | V | E | Y | S | D | Q | T | T | I | L | R | K | G | Y | W | P | S | Y | N | I | P | F | H | K | V | I | Y | N | M | S | G | Y | K | K | F | G | L | D | F | S | Y | E | M | A | P | R | A | K | I | F | R | R | D | Q | G | K | V | T | D | M | K | S | M | K | Y | I | M | R | Y | N | N | Y | K | K | D | P | Y | T | K | H | N | P | C | N | T | I | C | C | R | Q | D | L | N | Y | K | A | P | V | P | D | G | C | Y | D | S | K | V | S | D | I |
| M. paraensis      | DN16755_c1_g40_i2 m.29537 | G | H  | S  | S  | W  | F  | T  | Y  | A  | A  | T   | L   | R   | I   | Y   | K   | H   | W   | D   | F   | R   | I   | I   | D   | P   | Q   | T | K | T | G | R | A | S | F | S | S | Y | P | G | L | L | V | S | L | D | D | F |   |   |   |   |   |   |   |   |   |   |   |   |   |   |   |   |   |   |   |   |   |   |   |   |   |   |   |   |   |   |   |   |   |   |   |   |   |   |   |   |   |   |   |   |   |   |   |   |   |   |   |   |   |   |   |   |   |   |   |   |   |   |   |   |   |   |   |   |   |   |   |   |   |   |   |   |   |   |   |   |   |   |   |   |   |   |   |   |   |   |   |   |   |   |   |   |   |   |   |   |   |   |   |   |   |   |   |   |   |   |   |   |   |   |   |   |   |   |   |   |   |   |   |   |   |   |   |   |   |   |   |   |   |   |   |   |   |   |   |   |   |   |   |   |   |   |   |   |   |   |   |   |   |   |   |   |   |   |   |   |   |   |   |   |   |   |   |   |   |   |   |   |   |   |   |   |   |   |   |   |   |   |   |   |   |   |   |   |   |   |   |   |   |   |   |   |   |   |   |   |   |   |   |
