# Supplementary material for: Coralsnake Venomics: Analyses of Venom Gland Transcriptomes and Proteomes of Six Brazilian Taxa
Source: MDPI journal article supplement (doi:10.3390/toxins9060187), 2017-06-08
Supplement: s1 [file s1]

| 3Ftx Class | Species                | Accession                     | Protein              | Sequence              |
|------------|------------------------|-------------------------------|----------------------|-----------------------|
| Group 29   | <i>M. corallina</i>    | 3Ftx3 C6U1P.1                 | 3Ftx3                | MKTLLLTLLVVTIVCLDLGNT |
| Group 55   | <i>M. tener</i>        | 3Ftx2 JAS0199.1               | 3Ftx2                | MKTLLLTLLVVTIVCLDLGNT |
| Group 55   | <i>M. fulvus</i>       | 3Ftx1 JAS05078.1              | 3Ftx1                | MKTLLLTLLVVTIVCLDLGNT |
| Group 54   | <i>M. tener</i>        | 3Ftx1.5a JAS05222.1           | 3Ftx1.5a             | MKTLLLTLLVVTIVCLDLGNT |
| Group 54   | <i>M. tener</i>        | 3Ftx1.5b JAS05221.1           | 3Ftx1.5b             | MKTLLLTLLVVTIVCLDLGNT |
| Group 54   | <i>M. diastema</i>     | 3FtxDP AKN63202.1             | 3FtxDP               | MKTLLLTLLVVTIVCLDLGNT |
| Group 54   | <i>M. tener</i>        | 3Ftx12 JAS05227.1             | 3Ftx12               | MKTLLLTLLVVTIVCLDLGNT |
| Group 54   | <i>M. fulvus</i>       | 3Ftx10b JAS05084.1            | 3Ftx10b              | MKTLLLTLLVVTIVCLDLGNT |
| Group 54   | <i>M. fulvus</i>       | 3Ftx16 JAS05284.1             | 3Ftx16               | MKTLLLTLLVVTIVCLDLGNT |
| Group 54   | <i>M. fulvus</i>       | 3Ftx10a JAS05083.1            | 3Ftx10a              | MKTLLLTLLVVTIVCLDLGNT |
| Group 54   | <i>M. fulvus</i>       | 3Ftx10c JAS05083.1            | 3Ftx10c              | MKTLLLTLLVVTIVCLDLGNT |
| Group 54   | <i>M. clarki</i>       | clarkia1 C0HK04.1             | clarkia1             | MKTLLLTLLVVTIVCLDLGNT |
| Group 54   | <i>M. browni</i>       | 3Ftx3BH AKO63246.1            | 3Ftx3BH              | MKTLLLTLLVVTIVCLDLGNT |
| Group 54   | <i>M. browni</i>       | 3Ftx3BG AKO63245.1            | 3Ftx3BG              | MKTLLLTLLVVTIVCLDLGNT |
| Group 54   | <i>M. parensis</i>     | DN47384_c0_g1.i1[m.3913]      | DN47384_c0_g1.i1     | MKTLLLTLLVVTIVCLDLGNT |
| Group 54   | <i>M. aliostris</i>    | 3Ftx FSCPD3.1                 | 3Ftx                 | MKTLLLTLLVVTIVCLDLGNT |
| Group 28   | <i>M. fulvus</i>       | 3Ftx11 JAB52869.1             | 3Ftx11               | MKTLLLTLLVVTIVCLDLGNT |
| Group 28   | <i>M. diastema</i>     | 3FtxDN AKN63201.1             | 3FtxDN               | MKTLLLTLLVVTIVCLDLGNT |
| Group 28   | <i>M. tener</i>        | 3FtxTD AKO63251.1             | 3FtxTD               | MKTLLLTLLVVTIVCLDLGNT |
| Group 28   | <i>M. fulvus</i>       | 3Ftx7 JAB52847.1              | 3Ftx7                | MKTLLLTLLVVTIVCLDLGNT |
| Group 28   | <i>M. fulvus</i>       | 3Ftx1a JAB52864.1             | 3Ftx1a               | MKTLLLTLLVVTIVCLDLGNT |
| Group 28   | <i>M. fulvus</i>       | 3Ftx11a JAS05082.1            | 3Ftx11a              | MKTLLLTLLVVTIVCLDLGNT |
| Group 28   | <i>M. fulvus</i>       | 3Ftx11b JAS05081.1            | 3Ftx11b              | MKTLLLTLLVVTIVCLDLGNT |
| Group 28   | <i>M. fulvus</i>       | 3Ftx11c JAS05080.1            | 3Ftx11c              | MKTLLLTLLVVTIVCLDLGNT |
| Group 28   | <i>M. corallina</i>    | 3Ftx C6U1P.1                  | 3Ftx                 | MKTLLLTLLVVTIVCLDLGNT |
| Group 28   | <i>M. tener</i>        | 3Ftx9a JAS05180.1             | 3Ftx9a               | MKTLLLTLLVVTIVCLDLGNT |
| Group 28   | <i>M. tener</i>        | 3Ftx8b JAS05186.1             | 3Ftx8b               | MKTLLLTLLVVTIVCLDLGNT |
| Group 28   | <i>M. tener</i>        | 3Ftx8d JAS05183.1             | 3Ftx8d               | MKTLLLTLLVVTIVCLDLGNT |
| Group 28   | <i>M. tener</i>        | 3Ftx8a JAS05187.1             | 3Ftx8a               | MKTLLLTLLVVTIVCLDLGNT |
| Group 28   | <i>M. tener</i>        | 3Ftx8g JAS05181.1             | 3Ftx8g               | MKTLLLTLLVVTIVCLDLGNT |
| Group 28   | <i>M. tener</i>        | 3Ftx8c JAS05185.1             | 3Ftx8c               | MKTLLLTLLVVTIVCLDLGNT |
| Short Ntxs | <i>M. pyrochrypus</i>  | POCAR1.1                      | POCAR1               | MKTLLLTLLVVTIVCLDLGNT |
| Short Ntxs | <i>M. aliostris</i>    | 3Ftx AED89567.1               | 3Ftx                 | MKTLLLTLLVVTIVCLDLGNT |
| Short Ntxs | <i>M. frontalis</i>    | Frontonin I P86421.1          | Frontonin I          | MKTLLLTLLVVTIVCLDLGNT |
| Short Ntxs | <i>M. aliostris</i>    | 3Ftx FSCPE2.1                 | 3Ftx                 | MKTLLLTLLVVTIVCLDLGNT |
| Short Ntxs | <i>M. mipartitus</i>   | Mipartitus 1 B3EW8.1          | Mipartitus 1         | MKTLLLTLLVVTIVCLDLGNT |
| Short Ntxs | <i>M. latiocollis</i>  | 3FtxLD AKN63193.1             | 3FtxLD               | MKTLLLTLLVVTIVCLDLGNT |
| Short Ntxs | <i>M. latiocollis</i>  | 3Ftx K9MCX0.1                 | 3Ftx                 | MKTLLLTLLVVTIVCLDLGNT |
| Short Ntxs | <i>M. latiocollis</i>  | 3FtxLC AKN63192.1             | 3FtxLC               | MKTLLLTLLVVTIVCLDLGNT |
| Short Ntxs | <i>M. corallina</i>    | 3Ftx C6U1P.1                  | 3Ftx                 | MKTLLLTLLVVTIVCLDLGNT |
| Short Ntxs | <i>M. fulvus</i>       | 3Ftx9a JAS05068.1             | 3Ftx9a               | MKTLLLTLLVVTIVCLDLGNT |
| Short Ntxs | <i>M. fulvus</i>       | 3Ftx9b JAS05067.1             | 3Ftx9b               | MKTLLLTLLVVTIVCLDLGNT |
| Short Ntxs | <i>M. tener</i>        | 3Ftx17c JAS05211.1            | 3Ftx17c              | MKTLLLTLLVVTIVCLDLGNT |
| Short Ntxs | <i>M. tener</i>        | 3Ftx17e JAS05209.1            | 3Ftx17e              | MKTLLLTLLVVTIVCLDLGNT |
| Short Ntxs | <i>M. tener</i>        | 3Ftx17f JAS05208.1            | 3Ftx17f              | MKTLLLTLLVVTIVCLDLGNT |
| Short Ntxs | <i>M. tener</i>        | 3Ftx17g JAS05207.1            | 3Ftx17g              | MKTLLLTLLVVTIVCLDLGNT |
| Short Ntxs | <i>M. tener</i>        | 3Ftx17h JAS05206.1            | 3Ftx17h              | MKTLLLTLLVVTIVCLDLGNT |
| Short Ntxs | <i>M. tener</i>        | 3Ftx4b JAS05196.1             | 3Ftx4b               | MKTLLLTLLVVTIVCLDLGNT |
| Short Ntxs | <i>M. tener</i>        | 3Ftx16a JAS05220.1            | 3Ftx16a              | MKTLLLTLLVVTIVCLDLGNT |
| Short Ntxs | <i>M. tener</i>        | 3Ftx16d JAS05217.1            | 3Ftx16d              | MKTLLLTLLVVTIVCLDLGNT |
| Short Ntxs | <i>M. tener</i>        | 3Ftx4a JAS05197.1             | 3Ftx4a               | MKTLLLTLLVVTIVCLDLGNT |
| Short Ntxs | <i>M. tener</i>        | 3Ftx4c JAS05195.1             | 3Ftx4c               | MKTLLLTLLVVTIVCLDLGNT |
| Short Ntxs | <i>M. surinamensis</i> | 3Ftx MS1 P86094.1             | 3Ftx                 | MKTLLLTLLVVTIVCLDLGNT |
| Short Ntxs | <i>M. surinamensis</i> | 3Ftx MS3 P86097.1             | 3Ftx                 | MKTLLLTLLVVTIVCLDLGNT |
| Short Ntxs | <i>M. aliostris</i>    | FSCPE6.1                      | FSCPE6               | MKTLLLTLLVVTIVCLDLGNT |
| Short Ntxs | <i>M. tener</i>        | 3Ftx18 JAS05203.1             | 3Ftx18               | MKTLLLTLLVVTIVCLDLGNT |
| Short Ntxs | <i>M. fulvus</i>       | 3Ftx10 JAB52870.1             | 3Ftx10               | MKTLLLTLLVVTIVCLDLGNT |
| Short Ntxs | <i>M. tener</i>        | 3Ftx14 JAS05223.1             | 3Ftx14               | MKTLLLTLLVVTIVCLDLGNT |
| Short Ntxs | <i>M. diastema</i>     | 3FtxDM AKN63200.1             | 3FtxDM               | MKTLLLTLLVVTIVCLDLGNT |
| Short Ntxs | <i>M. fulvus</i>       | 3Ftx2e JAB52856.1             | 3Ftx2e               | MKTLLLTLLVVTIVCLDLGNT |
| Short Ntxs | <i>M. fulvus</i>       | 3Ftx2f JAB52855.1             | 3Ftx2f               | MKTLLLTLLVVTIVCLDLGNT |
| Short Ntxs | <i>M. fulvus</i>       | 3Ftx2a JAB52860.1             | 3Ftx2a               | MKTLLLTLLVVTIVCLDLGNT |
| Short Ntxs | <i>M. tener</i>        | 3Ftx19 JAS05202.1             | 3Ftx19               | MKTLLLTLLVVTIVCLDLGNT |
| Short Ntxs | <i>M. corallina</i>    | 3Ftx ACS74999.1               | 3Ftx                 | MKTLLLTLLVVTIVCLDLGNT |
| Short Ntxs | <i>M. fulvus</i>       | 3Ftx3 JAS05076.1              | 3Ftx3                | MKTLLLTLLVVTIVCLDLGNT |
| Short Ntxs | <i>M. tener</i>        | 3Ftx20 JAS05200.1             | 3Ftx20               | MKTLLLTLLVVTIVCLDLGNT |
| Short Ntxs | <i>M. fulvus</i>       | 3Ftx14 JAB52866.1             | 3Ftx14               | MKTLLLTLLVVTIVCLDLGNT |
| Short Ntxs | <i>M. parensis</i>     | DN77416_c16_g3.i1[m.5437]     | DN77416_c16_g3.i1    | MKTLLLTLLVVTIVCLDLGNT |
| Short Ntxs | <i>M. browni</i>       | 3FtxBF AKO63244.1             | 3FtxBF               | MKTLLLTLLVVTIVCLDLGNT |
| Short Ntxs | <i>M. corallina</i>    | 3Ftx ACS74998.1               | 3Ftx                 | MKTLLLTLLVVTIVCLDLGNT |
| Short Ntxs | <i>M. diastema</i>     | 3FtxDK AKN63198.1             | 3FtxDK               | MKTLLLTLLVVTIVCLDLGNT |
| Short Ntxs | <i>M. browni</i>       | 3FtxBB AKN63205.1             | 3FtxBB               | MKTLLLTLLVVTIVCLDLGNT |
| Short Ntxs | <i>M. diastema</i>     | 3FtxDL AKN63199.1             | 3FtxDL               | MKTLLLTLLVVTIVCLDLGNT |
| Short Ntxs | <i>M. latiocollis</i>  | 3FtxFL AKN63195.1             | 3FtxFL               | MKTLLLTLLVVTIVCLDLGNT |
| Short Ntxs | <i>M. latiocollis</i>  | 3FtxLE AKN63194.1             | 3FtxLE               | MKTLLLTLLVVTIVCLDLGNT |
| Short Ntxs | <i>M. fulvus</i>       | 3Ftx3 JAB52823.1              | 3Ftx3                | MKTLLLTLLVVTIVCLDLGNT |
| Short Ntxs | <i>M. fulvus</i>       | 3Ftx6 JAB52820.1              | 3Ftx6                | MKTLLLTLLVVTIVCLDLGNT |
| Short Ntxs | <i>M. tener</i>        | 3Ftx2 JAS05147.1              | 3Ftx2                | MKTLLLTLLVVTIVCLDLGNT |
| Short Ntxs | <i>M. browni</i>       | 3FtxBI AKO63247.1             | 3FtxBI               | MKTLLLTLLVVTIVCLDLGNT |
| Short Ntxs | <i>M. diastema</i>     | 3FtxDJ AKN63197.1             | 3FtxDJ               | MKTLLLTLLVVTIVCLDLGNT |
| Short Ntxs | <i>M. fulvus</i>       | 3Ftx14 JAB52822.1             | 3Ftx14               | MKTLLLTLLVVTIVCLDLGNT |
| Short Ntxs | <i>M. fulvus</i>       | 3Ftx1 JAS05045.1              | 3Ftx1                | MKTLLLTLLVVTIVCLDLGNT |
| Short Ntxs | <i>M. fulvus</i>       | 3Ftx5 JAB52821.1              | 3Ftx5                | MKTLLLTLLVVTIVCLDLGNT |
| Short Ntxs | <i>M. fulvus</i>       | 3Ftx2 JAB52824.1              | 3Ftx2                | MKTLLLTLLVVTIVCLDLGNT |
| Short Ntxs | <i>M. fulvus</i>       | 3Ftx1b JAB52826.1             | 3Ftx1b               | MKTLLLTLLVVTIVCLDLGNT |
| Short Ntxs | <i>M. fulvus</i>       | 3Ftx1a JAB52827.1             | 3Ftx1a               | MKTLLLTLLVVTIVCLDLGNT |
| Short Ntxs | <i>M. tener</i>        | 3Ftx1b JAS05150.1             | 3Ftx1b               | MKTLLLTLLVVTIVCLDLGNT |
| Short Ntxs | <i>M. tener</i>        | 3Ftx1a JAS05151.1             | 3Ftx1a               | MKTLLLTLLVVTIVCLDLGNT |
| Group 12   | <i>M. aliostris</i>    | 3FtxL6SC FSCPE3.1             | 3FtxL6SC             | MKTLLLTLLVVTIVCLDLGNT |
| Group 12   | <i>M. latiocollis</i>  | 3FtxLB AKM28629.1             | 3FtxLB               | MKTLLLTLLVVTIVCLDLGNT |
| Group 12   | <i>M. corallina</i>    | 3Ftx1 Q9PU87.1                | 3Ftx1                | MKTLLLTLLVVTIVCLDLGNT |
| Group 12   | <i>M. nigricans</i>    | 3Ftx1 K7187.1                 | 3Ftx1                | MKTLLLTLLVVTIVCLDLGNT |
| Group 12   | <i>M. fulvus</i>       | 3Ftx3 JAS05074.1              | 3Ftx3                | MKTLLLTLLVVTIVCLDLGNT |
| Group 12   | <i>M. tener</i>        | 3Ftx3 JAS05198.1              | 3Ftx3                | MKTLLLTLLVVTIVCLDLGNT |
| Short Ntxs | <i>M. browni</i>       | 3FtxBD AKO63242.1             | 3FtxBD               | MKTLLLTLLVVTIVCLDLGNT |
| Short Ntxs | <i>M. frontalis</i>    | 3Ftx Frontonin I P86420.1     | 3Ftx                 | MKTLLLTLLVVTIVCLDLGNT |
| Short Ntxs | <i>M. surinamensis</i> | 3Ftx P86095.1                 | 3Ftx                 | MKTLLLTLLVVTIVCLDLGNT |
| Short Ntxs | <i>M. aliostris</i>    | 3Ftx FSCPD5.1                 | 3Ftx                 | MKTLLLTLLVVTIVCLDLGNT |
| Short Ntxs | <i>M. pyrochrypus</i>  | 3FtxDI PCAR1.1                | 3FtxDI               | MKTLLLTLLVVTIVCLDLGNT |
| Short Ntxs | <i>M. latiocollis</i>  | 3FtxAI AFU76492.1             | 3FtxAI               | MKTLLLTLLVVTIVCLDLGNT |
| Short Ntxs | <i>M. browni</i>       | 3FtxBE AKO63243.1             | 3FtxBE               | MKTLLLTLLVVTIVCLDLGNT |
| Short Ntxs | <i>M. nigricans</i>    | 3FtxMon1 P80548.1             | 3FtxMon1             | MKTLLLTLLVVTIVCLDLGNT |
| Short Ntxs | <i>M. tener</i>        | 3Ftx5b JAS05193.1             | 3Ftx5b               | MKTLLLTLLVVTIVCLDLGNT |
| Short Ntxs | <i>M. diastema</i>     | 3FtxDH AKM28630.1             | 3FtxDH               | MKTLLLTLLVVTIVCLDLGNT |
| Short Ntxs | <i>M. tener</i>        | 3Ftx5a JAS05191.1             | 3Ftx5a               | MKTLLLTLLVVTIVCLDLGNT |
| Short Ntxs | <i>M. aliostris</i>    | 3Ftx57C FSCPD8.1              | 3Ftx57C              | MKTLLLTLLVVTIVCLDLGNT |
| Short Ntxs | <i>M. lemniscatus</i>  | DN120340_c190_g5.i1[m.46961]  | DN120340_c190_g5.i1  | MKTLLLTLLVVTIVCLDLGNT |
| Short Ntxs | <i>M. spici</i>        | DN102297_c479_g8.i1[m.10839]  | DN102297_c479_g8.i1  | MKTLLLTLLVVTIVCLDLGNT |
| Short Ntxs | <i>M. aliostris</i>    | 3Ftx AED89559.1               | 3Ftx                 | MKTLLLTLLVVTIVCLDLGNT |
| Short Ntxs | <i>M. frontalis</i>    | 3Ftx Frontonin III P86422.1   | 3Ftx                 | MKTLLLTLLVVTIVCLDLGNT |
| Short Ntxs | <i>M. pyrochrypus</i>  | 3Ftx PCAR4.1                  | 3Ftx                 | MKTLLLTLLVVTIVCLDLGNT |
| Short Ntxs | <i>M. aliostris</i>    | 3Ftx FSCPD9.1                 | 3Ftx                 | MKTLLLTLLVVTIVCLDLGNT |
| Short Ntxs | <i>M. aliostris</i>    | 3Ftx52C FSCPD6.1              | 3Ftx52C              | MKTLLLTLLVVTIVCLDLGNT |
| Short Ntxs | <i>M. fulvus</i>       | 3Ftx12 JAS05079.1             | 3Ftx12               | MKTLLLTLLVVTIVCLDLGNT |
| Short Ntxs | <i>M. browni</i>       | 3FtxBA AKN63204.1             | 3FtxBA               | MKTLLLTLLVVTIVCLDLGNT |
| Short Ntxs | <i>M. diastema</i>     | 3FtxDI AKN63196.1             | 3FtxDI               | MKTLLLTLLVVTIVCLDLGNT |
| Short Ntxs | <i>M. tener</i>        | 3Ftx11 JAS05228.1             | 3Ftx11               | MKTLLLTLLVVTIVCLDLGNT |
| Short Ntxs | <i>M. aliostris</i>    | 3Ftx AED89558.1               | 3Ftx                 | MKTLLLTLLVVTIVCLDLGNT |
| Short Ntxs | <i>M. corallina</i>    | 3Ftx ACS74994.1               | 3Ftx                 | MKTLLLTLLVVTIVCLDLGNT |
| Short Ntxs | <i>M. fulvus</i>       | 3Ftx10b JAS05231.1            | 3Ftx10b              | MKTLLLTLLVVTIVCLDLGNT |
| Short Ntxs | <i>M. browni</i>       | 3FtxBC AKN63206.1             | 3FtxBC               | MKTLLLTLLVVTIVCLDLGNT |
| Short Ntxs | <i>M. tener</i>        | 3Ftx10d JAS05229.1            | 3Ftx10d              | MKTLLLTLLVVTIVCLDLGNT |
| Short Ntxs | <i>M. tener</i>        | 3Ftx10e JAS05232.1            | 3Ftx10e              | MKTLLLTLLVVTIVCLDLGNT |
| Short Ntxs | <i>M. tener</i>        | 3Ftx10f JAS05230.1            | 3Ftx10f              | MKTLLLTLLVVTIVCLDLGNT |
| Short Ntxs | <i>M. tener</i>        | 3Ftx AKO63250.1               | 3Ftx                 | MKTLLLTLLVVTIVCLDLGNT |
| Short Ntxs | <i>M. corallina</i>    | DN76297_c337_g9.i1[g.13379]   | DN76297_c337_g9.i1   | MKTLLLTLLVVTIVCLDLGNT |
| Short Ntxs | <i>M. fulvus</i>       | 3Ftx8b JAS05069.1             | 3Ftx8b               | MKTLLLTLLVVTIVCLDLGNT |
| Short Ntxs | <i>M. tener</i>        | 3Ftx6 JAS05190.1              | 3Ftx6                | MKTLLLTLLVVTIVCLDLGNT |
| Short Ntxs | <i>M. aliostris</i>    | AED89572.1                    | AED89572             | MKTLLLTLLVVTIVCLDLGNT |
| Short Ntxs | <i>M. fulvus</i>       | 3Ftx7 JAS05071.1              | 3Ftx7                | MKTLLLTLLVVTIVCLDLGNT |
| Short Ntxs | <i>M. tener</i>        | 3Ftx7b JAS05188.1             | 3Ftx7b               | MKTLLLTLLVVTIVCLDLGNT |
| Short Ntxs | <i>M. lemniscatus</i>  | DN102976_c2_g5.i1[m.44748]    | DN102976_c2_g5.i1    | MKTLLLTLLVVTIVCLDLGNT |
| Short Ntxs | <i>M. surinamensis</i> | DN76393_c9_g3.i1[m.15932]     | DN76393_c9_g3.i1     | MKTLLLTLLVVTIVCLDLGNT |
| Short Ntxs | <i>M. corallina</i>    | DN90798_c6_g1.i1[m.3479]      | DN90798_c6_g1.i1     | MKTLLLTLLVVTIVCLDLGNT |
| Short Ntxs | <i>M. spici</i>        | DN34771_c2_g1.i1[m.40598]     | DN34771_c2_g1.i1     | MKTLLLTLLVVTIVCLDLGNT |
| Short Ntxs | <i>M. corallina</i>    | DN53567_c0_g1.i1              | DN53567_c0_g1.i1     | MKTLLLTLLVVTIVCLDLGNT |
| Short Ntxs | <i>M. corallina</i>    | DN53567_c0_g2.i1              | DN53567_c0_g2.i1     | MKTLLLTLLVVTIVCLDLGNT |
| Short Ntxs | <i>M. corallina</i>    | DN62882_c1_g1.i1[m.645]       | DN62882_c1_g1.i1     | MKTLLLTLLVVTIVCLDLGNT |
| Short Ntxs | <i>M. corallina</i>    | DN94900_c1_g1.i1[m.6088]      | DN94900_c1_g1.i1     | MKTLLLTLLVVTIVCLDLGNT |
| Short Ntxs | <i>M. lemniscatus</i>  | DN97299_c0_g1.i1[m.71040]     | DN97299_c0_g1.i1     | MKTLLLTLLVVTIVCLDLGNT |
| Short Ntxs | <i>M. lemniscatus</i>  | DN97299_c0_g6.i1[m.71043]     | DN97299_c0_g6.i1     | MKTLLLTLLVVTIVCLDLGNT |
| Short Ntxs | <i>M. parensis</i>     | DN7425_c2_g1.i1[m.10435]      | DN7425_c2_g1.i1      | MKTLLLTLLVVTIVCLDLGNT |
| Short Ntxs | <i>M. lemniscatus</i>  | DN120555_c26_g2.i1[m.34927]   | DN120555_c26_g2.i1   | MKTLLLTLLVVTIVCLDLGNT |
| Short Ntxs | <i>M. spici</i>        | DN102297_c479_g38.i1[m.10825] | DN102297_c479_g38.i1 | MKTLLLTLLVVTIVCLDLGNT |
| Short Ntxs | <i>M. lemniscatus</i>  | DN120555_c26_g52.i1[g.34919]  | DN120555_c26_g52.i1  | MKTLLLTLLVVTIVCLDLGNT |
| Short Ntxs | <i>M. lemniscatus</i>  | DN150997_c9_g4.i2[m.45848]    | DN150997_c9_g4.i2    | MKTLLLTLLVVTIVCLDLGNT |
| Short Ntxs | <i>M. corallina</i>    | DN14825_c0_g1.i1              | DN14825_c0_g1.i1     | MKTLLLTLLVVTIVCLDLGNT |
| Short Ntxs | <i>M. lemniscatus</i>  | DN160706_c14_g1.i1[m.30964]   | DN160706_c14_g1.i1   | MKTLLLTLLVVTIVCLDLGNT |
| Short Ntxs | <i>M. corallina</i>    | DN100099_c314_g1.i3[g.13828]  | DN100099_c314_g1.i3  | MKTLLLTLLVVTIVCLDLGNT |
| Short Ntxs | <i>M. spici</i>        | DN76956_c3_g2.i1[m.56103]     | DN76956_c3_g2.i1     | MKTLLLTLLVVTIVCLDLGNT |
| Group 53   | <i>M. aliostris</i>    | 3Ftx AED89574.1               | 3Ftx                 | MKTLLLTLLVVTIVCLDLGNT |
| Group 53   | <i>M. lemniscatus</i>  | DN120340_c190_g2.i1[m.46960]  | DN120340_c190_g2.i1  | MKTLLLTLLVVTIVCLDLGNT |
| Group 36   | <i>M. aliostris</i>    | AED89568.1                    | AED89568             | MKTLLLTLLVVTIVCLDLGNT |
| Group 36   | <i>M. lemniscatus</i>  | DN120555_c26_g86.i1[g.34931]  | DN120555_c26_g86.i1  | MKTLLLTLLVVTIVCLDLGNT |
| Group 36   | <i>M. aliostris</i>    | 3Ftx FSCPE4.1                 | 3Ftx                 | MKTLLLTLLVVTIVCLDLGNT |
| Group 36   | <i>M. aliostris</i>    | 3Ftx FSCPD7.1                 | 3Ftx                 | MKTLLLTLLVVTIVCLDLGNT |
| Group 36   | <i>M. lemniscatus</i>  | DN120555_c26_g85.i1[m.34930]  | DN120555_c26_g85.i1  | MKTLLLTLLVVTIVCLDLGNT |
| Group 36   | <i>M. lemniscatus</i>  | DN94862_c6_g1.i1[m.60963]     | DN94862_c6_g1.i1     | MKTLLLTLLVVTIVCLDLGNT |
| Group 31   | <i>M. tener</i>        | 3Ftx1 JAS05201.1              | 3Ftx1                | MKTLLLTLLVVTIVCLDLGNT |
| Group 31   | <i>M. fulvus</i>       | 3Ftx5a JAB52850.1             | 3Ftx5a               | MKTLLLTLLVVTIVCLDLGNT |
| Group 31   | <i>M. tener</i>        | 3Ftx4 JAS05075.1              | 3Ftx4                | MKTLLLTLLVVTIVCLDLGNT |
| Group 31   | <i>M. fulvus</i>       | 3Ftx5b JAB52849.1             | 3Ftx5b               | MKTLLLTLLVVTIVCLDLGNT |
| Group 51   | <i>M. parensis</i>     | DN85120_c84_g37.i5[m.16452]   | DN85120_c84_g37.i5   | MKTLLLTLLVVTIVCLDLGNT |
| Group 51   | <i>M. corallina</i>    | 3Ftx8 P58370.1                | 3Ftx8                | MKTLLLTLLVVTIVCLDLGNT |
| Group 51   | <i>M. diastema</i>     | 3FtxQ AKN63203.1              | 3FtxQ                | MKTLLLTLLVVTIVCLDLGNT |
| Group 39   | <i>M. mipartitus</i>   | MmTx2 COHUR1.1                | MmTx2                | MKTLLLTLLVVTIVCLDLGNT |
| Group 39   | <i>M. mipartitus</i>   | mipartitus 3Ftx COHUR1.1      | mipartitus 3Ftx      | MKTLLLTLLVVTIVCLDLGNT |
| Group 39   | <i>M. surinamensis</i> | 3Ftx MS5 P86099.1             | 3Ftx                 |                       |
