# Supplementary material for: Coralsnake Venomics: Analyses of Venom Gland Transcriptomes and Proteomes of Six Brazilian Taxa
Source: MDPI journal article supplement (doi:10.3390/toxins9060187), 2017-06-08
Supplement: s1 [file s1]

|                          |                             | 751                                                         | 760 | 770 | 780 |
|--------------------------|-----------------------------|-------------------------------------------------------------|-----|-----|-----|
| <i>M. spixii</i>         | DN98777_c1_g1_i1   m.34299  | D K D H G I E G H A H S H I Y H H M S H F I K Q C F K L P - |     |     |     |
| <i>M. corallinus</i>     | DN95281_c1_g3_i1   m.48219  | D K D H G I E G H A H S H I Y H H M S H F I K Q C F K L P * |     |     |     |
| <i>M. paraensis</i>      | DN78478_c0_g1_i1   m.26473  | D K D H G I E G H A H S H I Y H H M S H F I K Q C F K L P - |     |     |     |
| <i>M. l. carvalhoi</i>   | DN77914_c0_g2_i3   m.19742  | D K D H G I E G H A H N H I Y H H M S H F I K Q C F K L P * |     |     |     |
| <i>M. l. lemniscatus</i> | DN114870_c2_g1_i1   m.24463 | D K D H G I E G H A H S H I Y H H M S H F I K Q C F K L P * |     |     |     |
| <i>M. surinamensis</i>   | DN78016_c3_g1_i2   m.26115  | D K D H G I E G H A H S H I Y H H M S H F I K Q C F K L P * |     |     |     |
