# Supplementary material for: Coralsnake Venomics: Analyses of Venom Gland Transcriptomes and Proteomes of Six Brazilian Taxa
Source: MDPI journal article supplement (doi:10.3390/toxins9060187), 2017-06-08
Supplement: s1 [file s1]

| Species                        | Transcript ID               | -20             | -10                                                                                                                                                                                                                                                                                                           | -1                                                                                                                                                                                                                                                                              | 1                                                                                                                                                                                                                                                                           | 10 | 20 | 30 | 40 | 50 | 60 | 70 | 80 | 90 | 100 | 110 | 120 | 130 |
|--------------------------------|-----------------------------|-----------------|---------------------------------------------------------------------------------------------------------------------------------------------------------------------------------------------------------------------------------------------------------------------------------------------------------------|---------------------------------------------------------------------------------------------------------------------------------------------------------------------------------------------------------------------------------------------------------------------------------|-----------------------------------------------------------------------------------------------------------------------------------------------------------------------------------------------------------------------------------------------------------------------------|----|----|----|----|----|----|----|----|----|-----|-----|-----|-----|
| <i>Ovophis okinavensis</i>     | GBL BAN82148.1              | M G R F I F V - | S F G L L V L F L S L S G V Q G                                                                                                                                                                                                                                                                               | -                                                                                                                                                                                                                                                                               | S C P N D W L P M N G L C Y K I F D E R M A W E D A E M S C R K Y K P G C H L A S L H L Y G E S L E I A E Y I S D Y H K G Q A E V W I G L Q D K K K D F T W E W T D R S C T D Y L T W D K N Q P D H Y Q D K E F C V E L V S L T G Y R M W N D K E C K S K N A F L C Q C K F |    |    |    |    |    |    |    |    |    |     |     |     |     |
| <i>Bothrops jararaca</i>       | GBL P83519.2                | M G R F L F V A | S S A C W F V F L S L S G A K G                                                                                                                                                                                                                                                                               | N N C P Q D W L P M N G L C Y K I F N E L K A W K D A E M F C R K Y K P G C H L A S I H L Y G E S P E I A E Y I S D Y H K G Q S E V W I G L C D K K K D F S W E W T D R S C T D Y L S W D K N Q P D H Y Q N K E F C V E L V S N T G Y R L W N D Q V C E S K N A F L C Q C K F   |                                                                                                                                                                                                                                                                             |    |    |    |    |    |    |    |    |    |     |     |     |     |
| <i>Viridovipera stejnegeri</i> | GBL Q9YGP1.1                | M G R F I F V - | S F G L L V V F L S L S G A K G                                                                                                                                                                                                                                                                               | S C C T N D S L P M N G M C Y K I F D E P K T W E D A E M F C R K Y K P G C H L A S F H R L A E S L D I A E Y I S D Y H K R Q A E V W I G L L D R K K D F S W E W T D R S C T D Y L N W D K N Q P D H Y K D K E F C V E L V S L T G Y H R W N D Q V C E S K N S F L C Q C K F   |                                                                                                                                                                                                                                                                             |    |    |    |    |    |    |    |    |    |     |     |     |     |
| <i>Hoplocephalus stephensi</i> | GBL D2YVK1.1                | M G R F L L V - | T L S L L V V A F S L N G A N N                                                                                                                                                                                                                                                                               | C C C P Q D W L P K N G Y C Y K V F K D H K S W D D A E M F C R K L K P G C H L A S L H S N A D A F D F S E Y I T D Y L T G H D H V W I G L R D T E K N Y I W E W T D R S R T D F L P W K K D Q P D H H N N D E F C V E I V S F T G Y L Q W N D D S C T A L R P F L C Q C K H   |                                                                                                                                                                                                                                                                             |    |    |    |    |    |    |    |    |    |     |     |     |     |
| <i>Pseudechis australis</i>    | GBL D2YV12.1                | M G R F L L V - | T L S L L V M A F F L N G A N S                                                                                                                                                                                                                                                                               | C C C P Q D W L P R N G F C Y K V F N D L K T W D D A E M Y C R K F K P G C H L A S L H S N A D A V E F S E Y I T D Y L T G Q G H V W I G L R D T K K K Y I W E W T D R S R T D F L P W R K D Q P D H F N N E E F C V E I V N F T G Y L Q W N D D S C T A L R P F L C Q C K Y   |                                                                                                                                                                                                                                                                             |    |    |    |    |    |    |    |    |    |     |     |     |     |
| <i>Pseudechis porphyriacus</i> | GBL D2YVJ6.1                | M G R F L L V - | T L S L L V V A F S L N G A N S                                                                                                                                                                                                                                                                               | C C C P Q D W L P R N G F C Y K V F N H L K N W N D A E M Y C R K F K P G C H L A S L H S N A D A V E F S E Y I T D Y L T G Q G H V W I G L R D T K K K Y I W E W T D R S R T D F L P W R K D Q P D H F N N E E F C V E T V N F T G Y L Q W N D D S C T A L R P F L C Q C K Y   |                                                                                                                                                                                                                                                                             |    |    |    |    |    |    |    |    |    |     |     |     |     |
| <i>M. corallinus</i>           | DN79899_c0_g1_i1 m.30755    | - - - - -       | - - - - - L N G A N S                                                                                                                                                                                                                                                                                         | C C C P Q D W L P K N G F C Y K V F N D R K N W N D A E T F C R K H K P G C H L A S I H G S E E S T D L A E Y V S D Y L K R G G N V W I G L N D P R K Q R N W Q W T D R S R N S Y L T W K P G E P N N L R N N E N C V E L W S A S G Y K N W N D E N C A S T R A Y L C K C R F   |                                                                                                                                                                                                                                                                             |    |    |    |    |    |    |    |    |    |     |     |     |     |
| <i>M. corallinus</i>           | DN72691_c0_g1_i1 m.44067    | M G Q F I I V - | N L S L L V M V L S L R G V K G                                                                                                                                                                                                                                                                               | C C C P D D W L S G K G F C Y K V N D E L K T W D D A E M F C R K Y K P G C H L V S I H S A A E S A D L A E Y I S D Y L K G D G N V W - - - - -                                                                                                                                 |                                                                                                                                                                                                                                                                             |    |    |    |    |    |    |    |    |    |     |     |     |     |
| <i>M. paraensis</i>            | DN99644_c0_g1_i1 m.4182     | M G R F L L V - | T L G L L V V A F S L N G A N S                                                                                                                                                                                                                                                                               | C C C P Q D W L P K N G F C Y K V F N D R K N W N D A E T F C R K H K P G C H L A S I H G S E E S T D L A E Y V S D Y L R S G G N V W I G L N D P R K Q R N W Q W T D R S R N S Y L - - - - -                                                                                   |                                                                                                                                                                                                                                                                             |    |    |    |    |    |    |    |    |    |     |     |     |     |
| <i>M. l. lemniscatus</i>       | DN89726_c0_g1_i1 m.66060    | - - - - -       | - - - - - N G A N S                                                                                                                                                                                                                                                                                           | C C C P Q D W L P K N G F C Y K V F N D R K N W N D A E T F C R K H K P G C H L A S I H G S E E S T D L A E Y V S D Y L R S G G N V W I G L N D P R K Q R N W Q W T D R S R N S Y L T W K P G E P N N L R N N E N C V E L W S A S G Y K N W N D E N C A S T R A Y L C K C R F   |                                                                                                                                                                                                                                                                             |    |    |    |    |    |    |    |    |    |     |     |     |     |
| <i>M. l. carvalhoi</i>         | DN88725_c0_g1_i1 m.31265    | - - - - -       | - - - - -                                                                                                                                                                                                                                                                                                     | - - - - - L P K N G F C Y K V F N D R K N W N D A E T F C R K H K P G C H L A S I H G S E E S T D L A E Y V S D Y L R S G G N V W I G L N D P R K Q R N W Q W T D R S R N S Y L T W K P G E P N N L R N N E N C V E L W S A S G Y K N W N D E N C A S T R A Y L C K C R F       |                                                                                                                                                                                                                                                                             |    |    |    |    |    |    |    |    |    |     |     |     |     |
| <i>M. paraensis</i>            | DN3061_c2_g1_i1 m.10450     | - - - - -       | - - - - -                                                                                                                                                                                                                                                                                                     | - - - - - Q D W L P K N G F C Y K V F N D R K N W N D A E T F C R K H K P G C H L A S I H G S E E S T D L A E Y V S D Y L R S G G N V W I G L N D P R K Q R N W Q W T D R S R N S Y L T W K P G E P N N L R N N E N C V E L W S A S G Y K N W N D E N C A S T R A Y L C K C R F |                                                                                                                                                                                                                                                                             |    |    |    |    |    |    |    |    |    |     |     |     |     |
| <i>M. l. carvalhoi</i>         | DN65513_c0_g1_i1 m.28716    | M G H F T F I - | S L C L M P I F L S L S G A E C Y T C P I D W L S R N G L C Y K L F D D T K T W P D A E I F C R K H K P G C H L T S I H S E A E S A D L A E Y I Y D Y L K S E K N V W I G L N D P Q K E R I W E W T D R S S T N Y - - - - -                                                                                   |                                                                                                                                                                                                                                                                                 |                                                                                                                                                                                                                                                                             |    |    |    |    |    |    |    |    |    |     |     |     |     |
| <i>M. corallinus</i>           | DN85871_c3_g1_i1 m.62160    | M G H F T F I - | S L C L M P I F L S L S G A E C Y T C P I D W L S R N G L C Y K L F D D T K T W P D A E I F C R K H K P G C H L T S I H S E A E S A D L A E Y I Y D Y L K S E K N V W I G L N D P Q K E R I W E W T D R S S T N Y T S W N E G E P N N S W N K E Y C V H L L A S Q G Y L K W N D T P C E S L F A F I C R C Q F |                                                                                                                                                                                                                                                                                 |                                                                                                                                                                                                                                                                             |    |    |    |    |    |    |    |    |    |     |     |     |     |
| <i>M. paraensis</i>            | DN17199_c0_g1_i1 m.16007    | M G H F T F I - | S L C L M P I F L S L S G A E C Y T C P I D W L S R N G L C Y K L F D D T K T W P D A E I F C R K H K P G C H L T S I H S E A E S A D L A E Y I Y D Y L K S E K N V W I G L N D P Q K E R I W E W T D R S S T N Y T S W N E G E P N N S W N K E Y C V H L L A S Q G Y L K W N D T P C E S L F A F I C R C Q F |                                                                                                                                                                                                                                                                                 |                                                                                                                                                                                                                                                                             |    |    |    |    |    |    |    |    |    |     |     |     |     |
| <i>M. corallinus</i>           | DN65513_c0_g3_i1 m.28718    | M G H F T F I - | S L C L M P I F L S L S G A E C Y T C P I D W L S R N G L C Y K L F D D T K T W P D A E M F C R K H K P G C H L T S I H S E A E S A D L A E Y I Y D Y L K S E K N V W I G L N D P Q K E R I W E W T D R S S T N Y - - - - -                                                                                   |                                                                                                                                                                                                                                                                                 |                                                                                                                                                                                                                                                                             |    |    |    |    |    |    |    |    |    |     |     |     |     |
| <i>M. surinamensis</i>         | DN76622_c1_g1_i1 m.25232    | M D H F T F I - | N F C L M P M F L S L S G V E C Y T C P I D W L S R N G F C Y K L F D D P K A W P D A E M F C R K H K P G C H L V S I H S A A E S A D L A E Y V S D Y L K S D T N V W I G L N D P Q K A G P W E W T D R S S T N Y S S W N E G E P N N S W N K E Y C V H L L T V K G Y H K W N D T P C E S L F S F I C K C E F |                                                                                                                                                                                                                                                                                 |                                                                                                                                                                                                                                                                             |    |    |    |    |    |    |    |    |    |     |     |     |     |
| <i>M. l. lemniscatus</i>       | DN117978_c2_g1_i1 m.33959   | M D H F T F I - | S L C L M P M F L S L S G V E C Y T C P I D W L S R N G F C Y K L F D D P K T W P D A E M F C R K H K P G C H L V S I H S A A E S A D L A E Y I S D Y L K S N K N V W I G M N D P E K N R T W A W T D R S S T N Y T S W N E G E P N N S W N K E Y C V H L L T L K G Y H K W N D T P C E S L F S F I C K C R F |                                                                                                                                                                                                                                                                                 |                                                                                                                                                                                                                                                                             |    |    |    |    |    |    |    |    |    |     |     |     |     |
| <i>M. l. carvalhoi</i>         | DN1151_c0_g1_i1 m.24490     | M D H F T F I - | S L C L M P M F L S L S G A E C Y T C P I D W L S R N G F C Y K L F D D P K A W P D A E M F C R K H K P G C H L V S I H S A A E S A D L A E Y V S D Y L K S D K N V W I G L N D P E K N R T W E W T D R S S T N Y T S W N E G E P N N S W N K E Y C V H L L T L K G Y H K W N D T P C E S L F S F I C K C K F |                                                                                                                                                                                                                                                                                 |                                                                                                                                                                                                                                                                             |    |    |    |    |    |    |    |    |    |     |     |     |     |
| <i>M. surinamensis</i>         | DN76622_c1_g1_i2 m.25235    | M D H F T F I - | N F C L M P M F L S L S G A E C Y N C P I D W L S R N G F C Y K L F D D P K A W P D A E M F C R K H K P G C H L V S I H S A A E S A D L A E Y V S D Y L K S D T N V W I G L N D P Q K E R I W E W T D R S S T N Y S S W N E G E P N N S W N K E Y C V H L L A S Q G Y L K W N D T P C E S L F A F I C R C Q F |                                                                                                                                                                                                                                                                                 |                                                                                                                                                                                                                                                                             |    |    |    |    |    |    |    |    |    |     |     |     |     |
| <i>M. spixii</i>               | DN19016_c0_g1_i1 m.61467    | M G H F T F I - | S L C L V P M F L S L S G A E C Y N C P I D W L S R N G F C Y K L F D D P K A W P D A E M F C R K H K P G C H L V S I H S A A E S A D L A E Y V S D Y L K S K K N V W I G L N D P E K N R T W E W T D R S S T N Y S S W N E G E P N N S R N E E Y C V H L L T L K G Y H K W N D T P C K S L F S F I C K C K F |                                                                                                                                                                                                                                                                                 |                                                                                                                                                                                                                                                                             |    |    |    |    |    |    |    |    |    |     |     |     |     |
| <i>M. spixii</i>               | DN102297_c462_g1_i1 m.10803 | M G H F T F I - | S L C L V P M F L S L S G A E C Y N C P I D W L S R N G F C Y K L F D D P K A W P D A E M F C R K H K P G C H L V S I H S A A E S A D L A E Y V S D Y L K S K K N V W I G L N D P E K N R T W E W T D R S S T N Y S S W N E G E P N N S R N E E Y C V H L L T L K G Y H K W N D T P C K S L F S F I C K C -   |                                                                                                                                                                                                                                                                                 |                                                                                                                                                                                                                                                                             |    |    |    |    |    |    |    |    |    |     |     |     |     |
