# Supplementary material for: Coralsnake Venomics: Analyses of Venom Gland Transcriptomes and Proteomes of Six Brazilian Taxa
Source: MDPI journal article supplement (doi:10.3390/toxins9060187), 2017-06-08
Supplement: s1 [file s1]

|                           |                            | 251 | 260 | 270 | 280 | 290 | 300 | 310 | 320 | 330 | 340 | 350 | 360 | 370 | 380 | 390 | 400 |   |   |   |   |   |   |   |   |   |   |   |   |   |   |   |   |   |   |   |   |   |   |   |   |   |   |   |   |   |   |   |   |   |   |   |   |   |   |   |   |   |   |   |   |   |   |   |   |   |   |   |   |   |   |   |   |   |   |   |   |   |   |   |   |   |   |   |   |   |   |   |   |   |   |   |   |   |   |   |   |   |   |   |   |   |   |   |   |   |   |   |   |   |   |   |   |   |   |   |   |   |   |   |   |   |   |   |   |   |   |   |   |   |   |   |   |   |   |   |   |   |   |   |   |   |   |   |   |   |   |   |   |   |
|---------------------------|----------------------------|-----|-----|-----|-----|-----|-----|-----|-----|-----|-----|-----|-----|-----|-----|-----|-----|---|---|---|---|---|---|---|---|---|---|---|---|---|---|---|---|---|---|---|---|---|---|---|---|---|---|---|---|---|---|---|---|---|---|---|---|---|---|---|---|---|---|---|---|---|---|---|---|---|---|---|---|---|---|---|---|---|---|---|---|---|---|---|---|---|---|---|---|---|---|---|---|---|---|---|---|---|---|---|---|---|---|---|---|---|---|---|---|---|---|---|---|---|---|---|---|---|---|---|---|---|---|---|---|---|---|---|---|---|---|---|---|---|---|---|---|---|---|---|---|---|---|---|---|---|---|---|---|---|---|---|---|---|
| <i>Ophiophagus hannah</i> | VEGF C ETE60014.1          | D   | T   | A   | E   | G   | Y   | H   | D   | I   | C   | G   | S   | N   | K   | E   | L   | D | E | E | T | C | Q | C | V | C | K | G | G | V | T | P | S | S | C | G | I | H | K | E | L | D | R | T | S | C | Q | C | T | C | K | N | K | L | L | P | S | S | C | G | L | N | K | E | F | D | E | E | K | C | Q | C | V | C | K | R | T | C | P | K | H | Q | P | L | N | P | T | K | C | I | C | E | C | V | E | S | P | N | K | C | F | L | K | G | E | R | F | H | H | Q | T | C | S | C | Y | R | R | P | C | T | V | R | K | K | R | C | D | S | G | F | Y | Y | S | E | E | V | C | R | C | V | P | T | Y | W | K | L | P | L | I | N |
| <i>M. fulvus</i>          | Long VEGF-C GBEW01001209.1 | D   | T   | A   | E   | G   | Y   | H   | D   | I   | C   | G   | S   | N   | K   | E   | L   | D | E | E | T | C | Q | C | V | C | K | G | G | V | T | P | S | S | C | G | I | H | K | E | L | D | R | T | S | C | Q | C | T | C | K | N | K | L | L | P | S | S | C | G | L | N | K | E | F | D | E | E | K | C | Q | C | V | C | K | R | T | C | P | K | H | Q | P | L | N | P | T | K | C | I | C | E | C | V | E | S | P | N | K | C | F | L | K | G | E | R | F | H | H | Q | T | C | S | C | Y | R | R | P | C | T | V | R | K | K | R | C | D | S | G | F | Y | Y | S | E | E | V | C | R | C | V | P | T | Y | W | K | L | P | L | I | N |
| <i>M. corallinus</i>      | DN18731_c0_g3_i1 m.24015   | D   | T   | A   | E   | G   | Y   | H   | D   | I   | C   | G   | S   | N   | K   | E   | L   | D | E | E | T | C | Q | C | V | C | K | G | G | V | T | P | S | S | C | G | I | H | K | E | L | D | R | T | S | C | Q | C | T | C | K | N | K | L | L | P | S | S | C | G | L | N | K | E | F | D | E | E | K | C | Q | C | V | C | K | R | T | C | P | K | H | Q | P | L | N | P | T | K | C | I | C | E | C | V | E | S | P | N | K | C | F | L | K | G | E | R | F | H | H | Q | T | C | S | C | Y | R | R | P | C | T | V | R | K | K | R | C | D | S | G | F | Y | Y | S | E | E | V | C | R | C | V | P | T | Y | W | K | L | P | L | I | N |
| <i>M. l. carvalhoi</i>    | DN72154_c1_g3_i1 m.1898    | D   | T   | A   | E   | G   | Y   | H   | D   | I   | C   | G   | S   | N   | K   | E   | L   | D | E | E | T | C | Q | C | V | C | K | G | G | V | T | P | S | S | C | G | I | H | K | E | L | D | R | T | S | C | Q | C | T | C | K | N | K | L | L | P | S | S | C | G | L | N | K | E | F | D | E | E | K | C | Q | C | V | C | K | R | T | C | P | K | H | Q | P | L | N | P | T | K | C | I | C | E | C | V | E | S | P | N | K | C | F | L | K | G | E | R | F | H | H | Q | T | C | S | C | Y | R | R | P | C | T | V | R | K | K | R | C | D | S | G | F | Y | Y | S | E | E | V | C | R | C | V | P | T | Y | W | K | L | P | L | I | N |
| <i>M. l. lemniscatus</i>  | DN112412_c0_g1_i1 m.8487   | D   | T   | A   | E   | G   | Y   | H   | D   | I   | C   | G   | S   | N   | K   | E   | L   | D | E | E | T | C | Q | C | V | C | K | G | G | V | T | P | S | S | C | G | I | H | K | E | L | D | R | T | S | C | Q | C | T | C | K | N | K | L | L | P | S | S | C | G | L | N | K | E | F | D | E | E | K | C | Q | C | V | C | K | R | T | C | P | K | H | Q | P | L | N | P | T | K | C | I | C | E | C | V | E | S | P | N | K | C | F | L | K | G | E | R | F | H | H | Q | T | C | S | C | Y | R | R | P | C | T | V | R | K | K | R | C | D | S | G | F | Y | Y | S | E | E | V | C | R | C | V | P | T | Y | W | K | L | P | L | I | N |
| <i>M. paraensis</i>       | DN69982_c0_g2_i1 m.23152   | D   | T   | A   | E   | G   | Y   | H   | D   | I   | C   | G   | S   | N   | K   | E   | L   | D | E | E | T | C | Q | C | V | C | K | G | G | V | T | P | S | S | C | G | I | H | K | E | L | D | R | T | S | C | Q | C | T | C | K | N | K | L | L | P | S | S | C | G | L | N | K | E | F | D | E | E | K | C | Q | C | V | C | K | R | T | C | P | K | H | Q | P | L | N | P | T | K | C | I | C | E | C | V | E | S | P | N | K | C | F | L | K | G | E | R | F | H | H | Q | T | C | S | C | Y | R | R | P | C | T | V | R | K | K | R | C | D | S | G | F | Y | Y | S | E | E | V | C | R | C | V | P | T | Y | W | K | L | P | L | I | N |
| <i>M. spixii</i>          | DN101683_c6_g1_i2 m.1424   | D   | T   | A   | E   | G   | Y   | H   | D   | I   | C   | G   | S   | N   | K   | E   | L   | D | E | E | T | C | Q | C | V | C | K | G | G | V | T | P | S | S | C | G | I | H | K | E | L | D | R | T | S | C | Q | C | T | C | K | N | K | L | L | P | S | S | C | G | L | N | K | E | F | D | E | E | K | C | Q | C | V | C | K | R | T | C | P | K | H | Q | P | L | N | P | T | K | C | I | C | E | C | V | E | S | P | N | K | C | F | L | K | G | E | R | F | H | H | Q | T | C | S | C | Y | R | R | P | C | T | V | R | K | K | R | C | D | S | G | F | Y | Y | S | E | E | V | C | R | C | V | P | T | Y | W | K | L | P | L | I | N |
| <i>M. surinamensis</i>    | DN76471_c0_g1_i1 m.3433    | D   | T   | A   | E   | G   | Y   | H   | D   | I   | C   | G   | S   | N   | K   | E   | L   | D | E | E | T | C | Q | C | V | C | K | G | G | V | T | P | S | S | C | G | I | H | K | E | L | D | R | T | S | C | Q | C | T | C | K | N | K | L | L | P | S | S | C | G | L | N | K | E | F | D | E | E | K | C | Q | C | V | C | K | R | T | C | P | K | H | Q | P | L | N | P | T | K | C | I | C | E | C | V | E | S | P | N | K | C | F | L | K | G | E | R | F | H | H | Q | T | C | S | C | Y | R | R | P | C | T | V | R | K | K | R | C | D | S | G | F | Y | Y | S | E | E | V | C | R | C | V | P | T | Y | W | K | L | P | L | I | N |
