# Supplementary figures and images for: Coralsnake Venomics: Analyses of Venom Gland Transcriptomes and Proteomes of Six Brazilian Taxa
Source: MDPI journal article supplement (doi:10.3390/toxins9060187), 2017-06-08

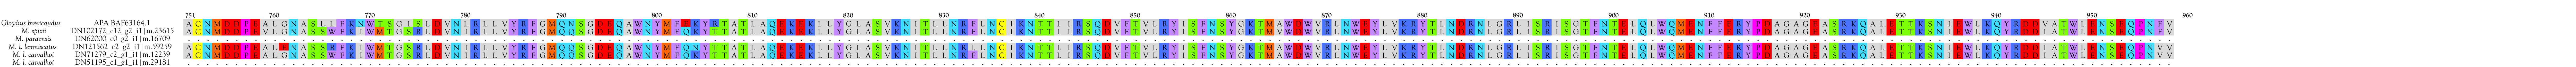

Supplement: s1 [file s1]

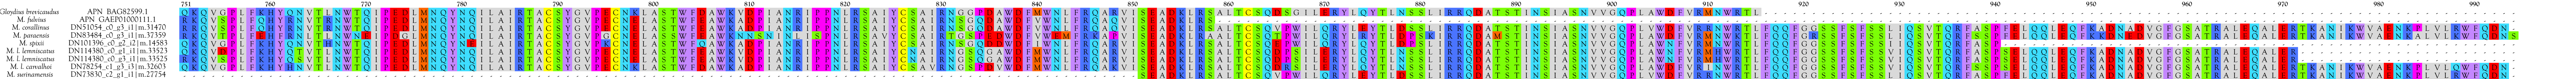

Supplement: s1 [file s1]

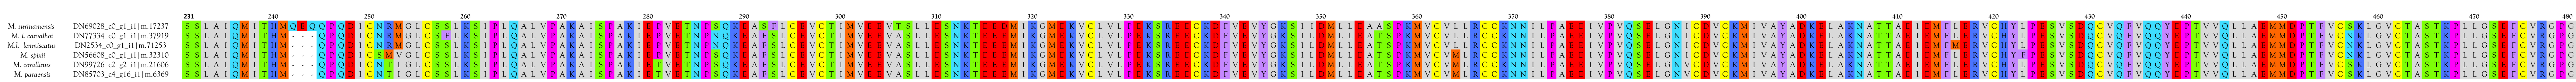

Supplement: s1 [file s1]

KDa

250

150

100

75

50

37

25

20

15

10

Frac.1

Frac.2

Frac.3

Frac.4

Frac.5

Frac.6

Frac.7

Frac.8

Frac.9

Frac.10

Frac.11

Frac.12

Frac.13

Frac.14

Frac.15

Frac.16

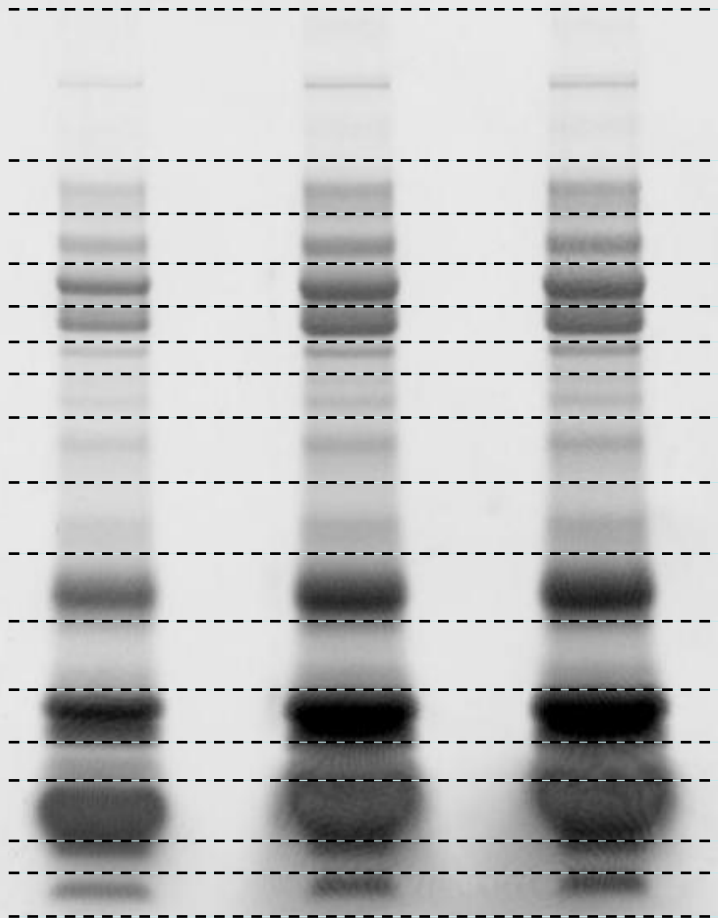

Supplement: s1 [file s1]

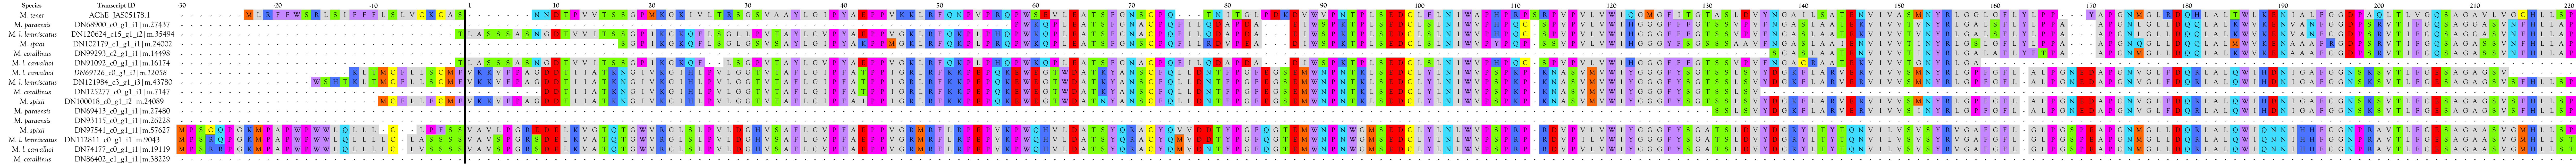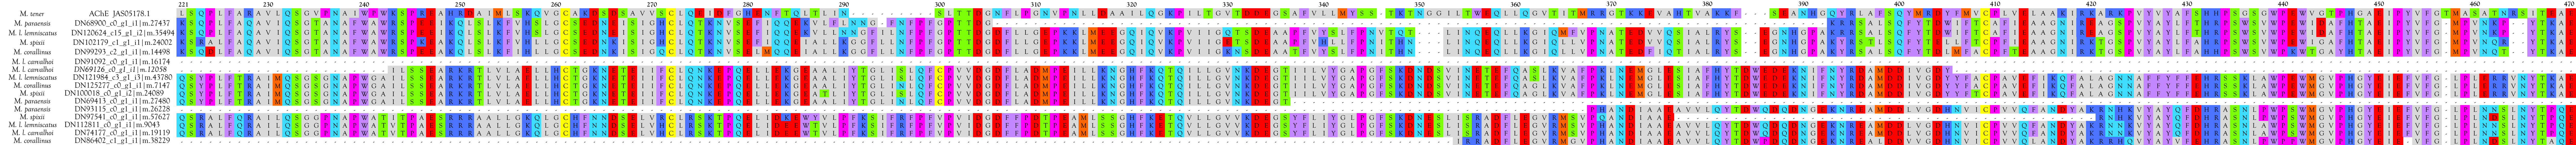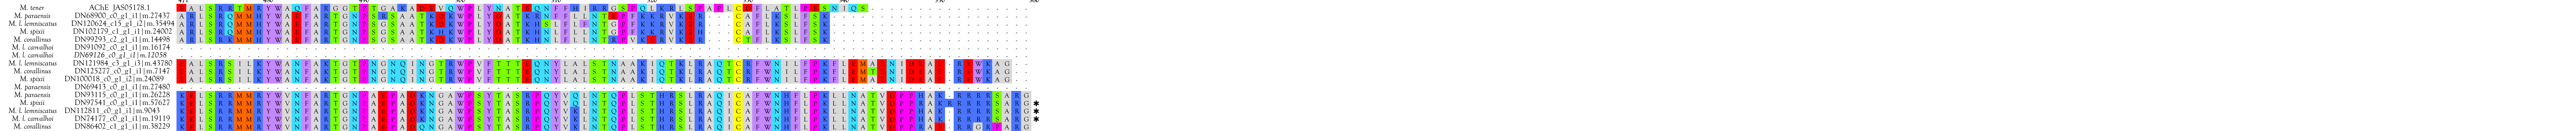

Supplement: s1 [file s1]

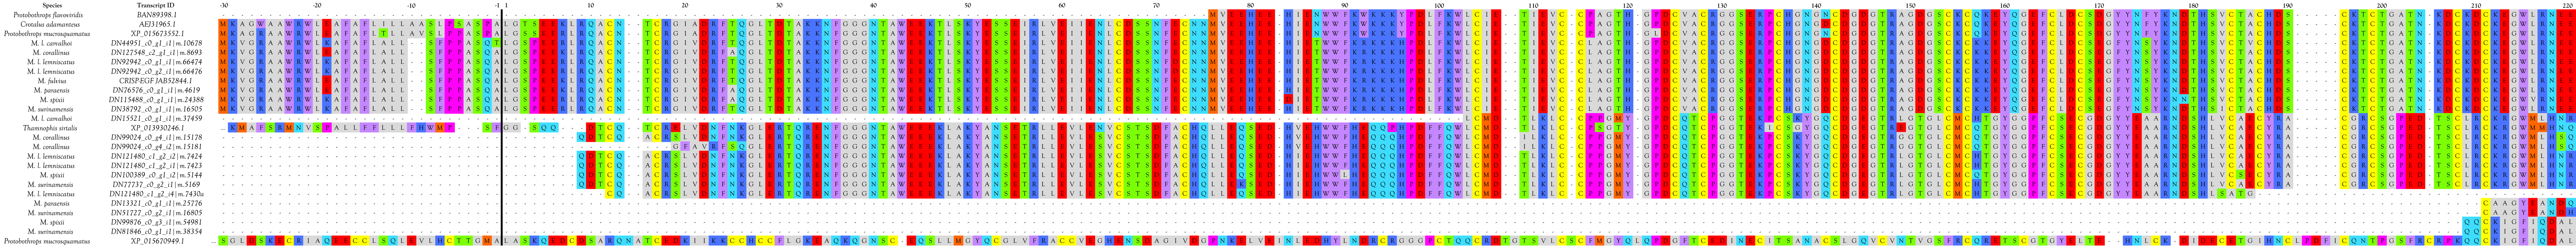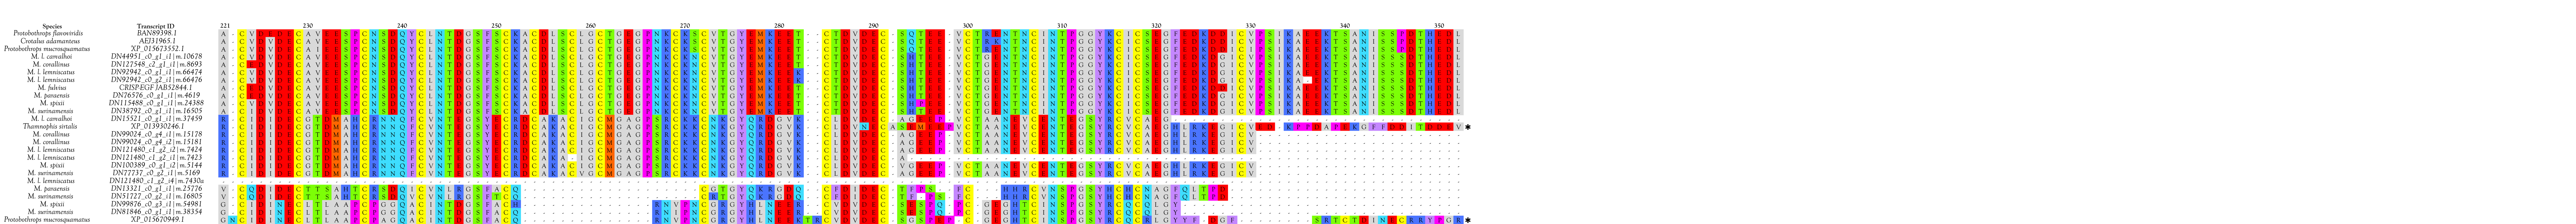

Supplement: s1 [file s1]
